# Supplementary material for: Silica: An efficient catalyst for one-pot regioselective synthesis of dithioethers
Source: publisher site journal article supplement (doi:10.3762/bjoc.10.5), 2014-01-07

# Supporting Information

for

## **Silica: An efficient catalyst for one-pot regioselective synthesis of dithioethers**

Samir Kundu<sup>1</sup>, Babli Roy<sup>1</sup> and Basudeb Basu\*<sup>1</sup>

Address: <sup>1</sup>Department of Chemistry, North Bengal University, Darjeeling 734013,  
India, Fax: +91 353 2699001

Email: Basudeb Basu\* - basu\_nbu@hotmail.com

\*Corresponding author

**<sup>1</sup>H NMR and <sup>13</sup>C NMR spectra for compounds listed in**

**Table 2, entries 1–19**

Table 2; Entry 1

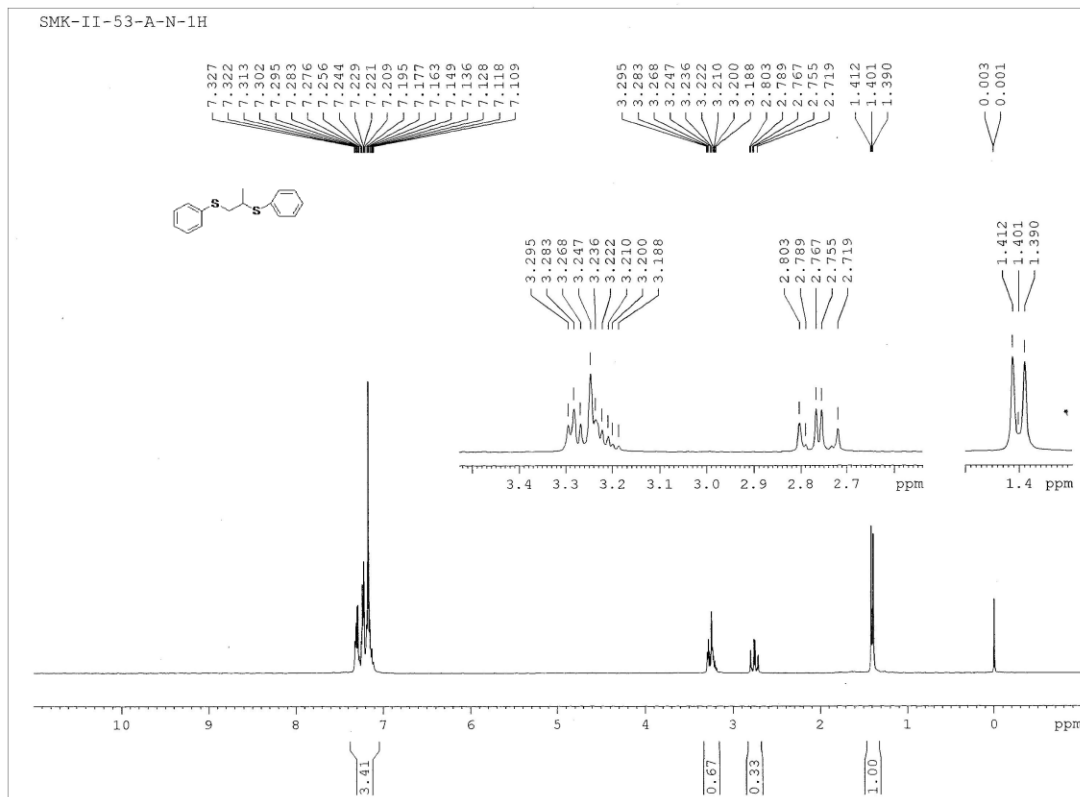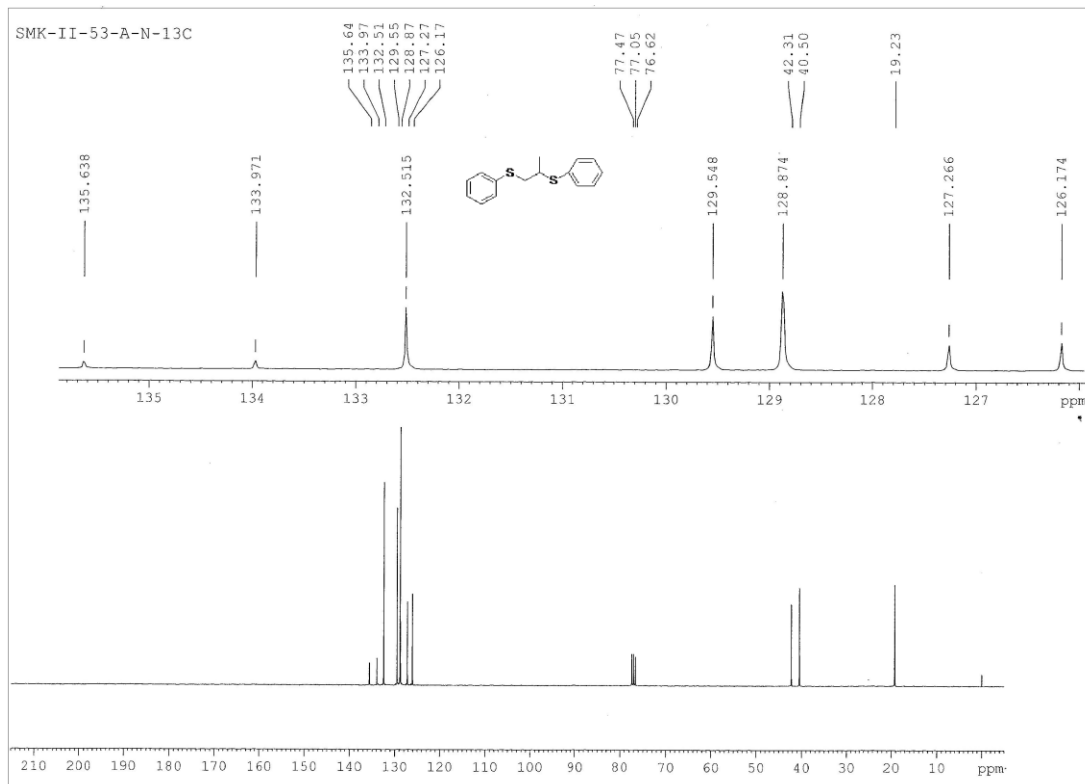

Table 2; Entry 2

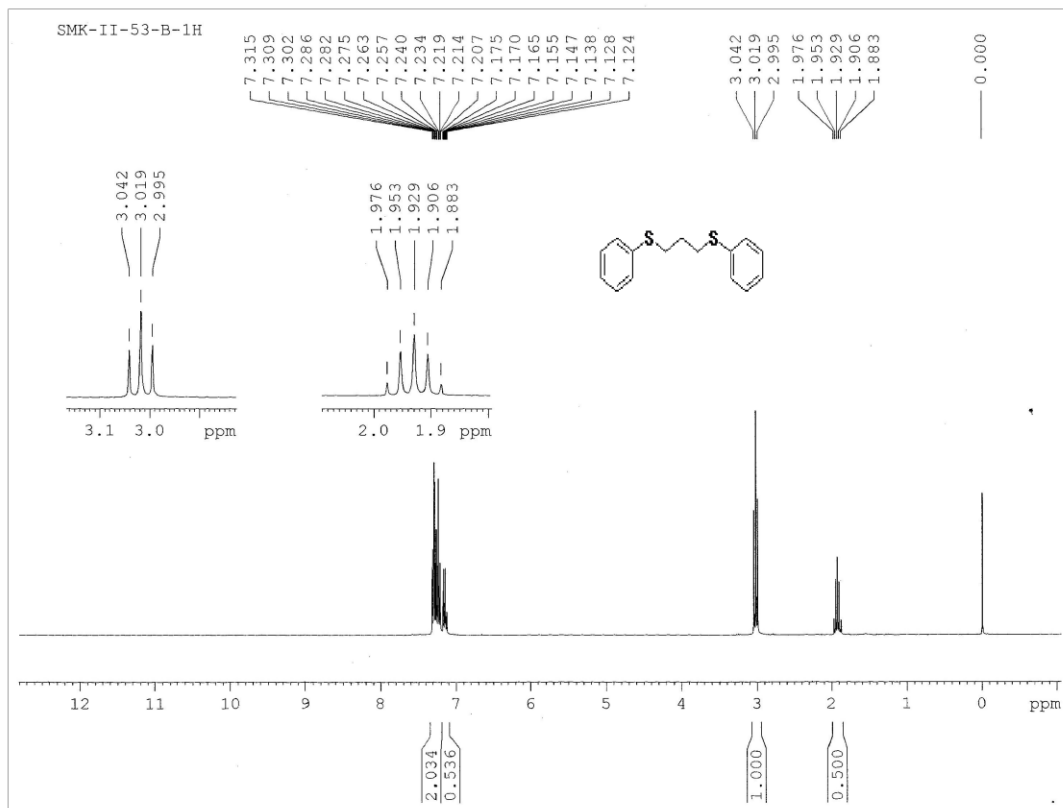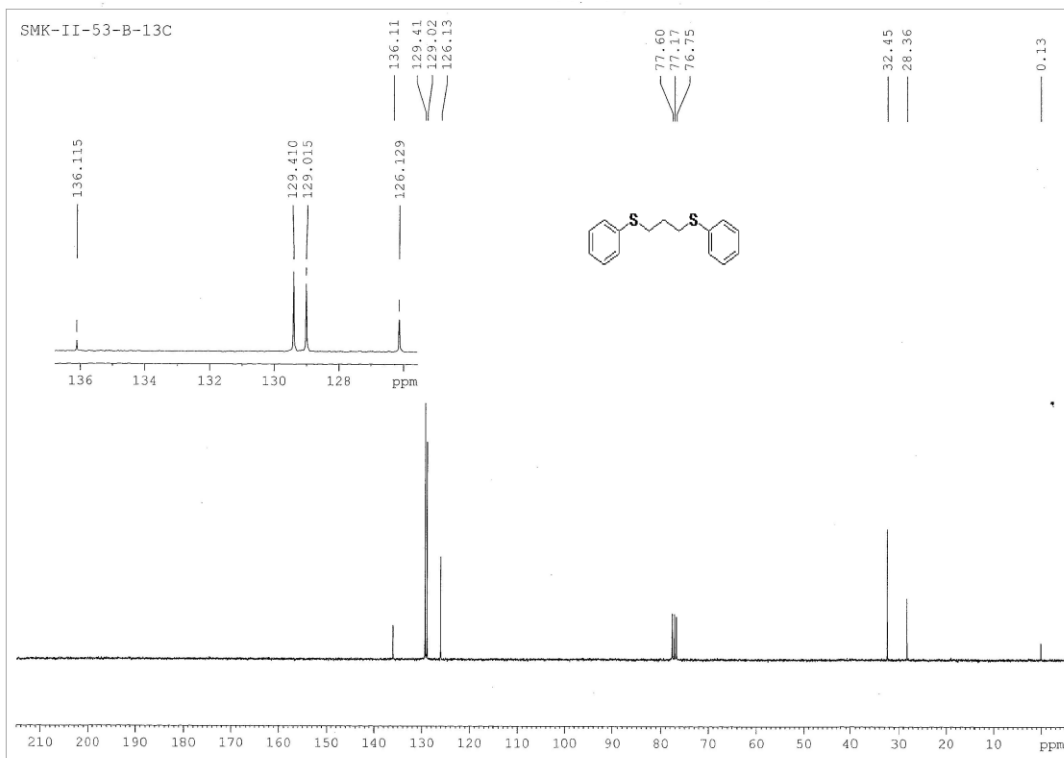

Table 2; Entry 3

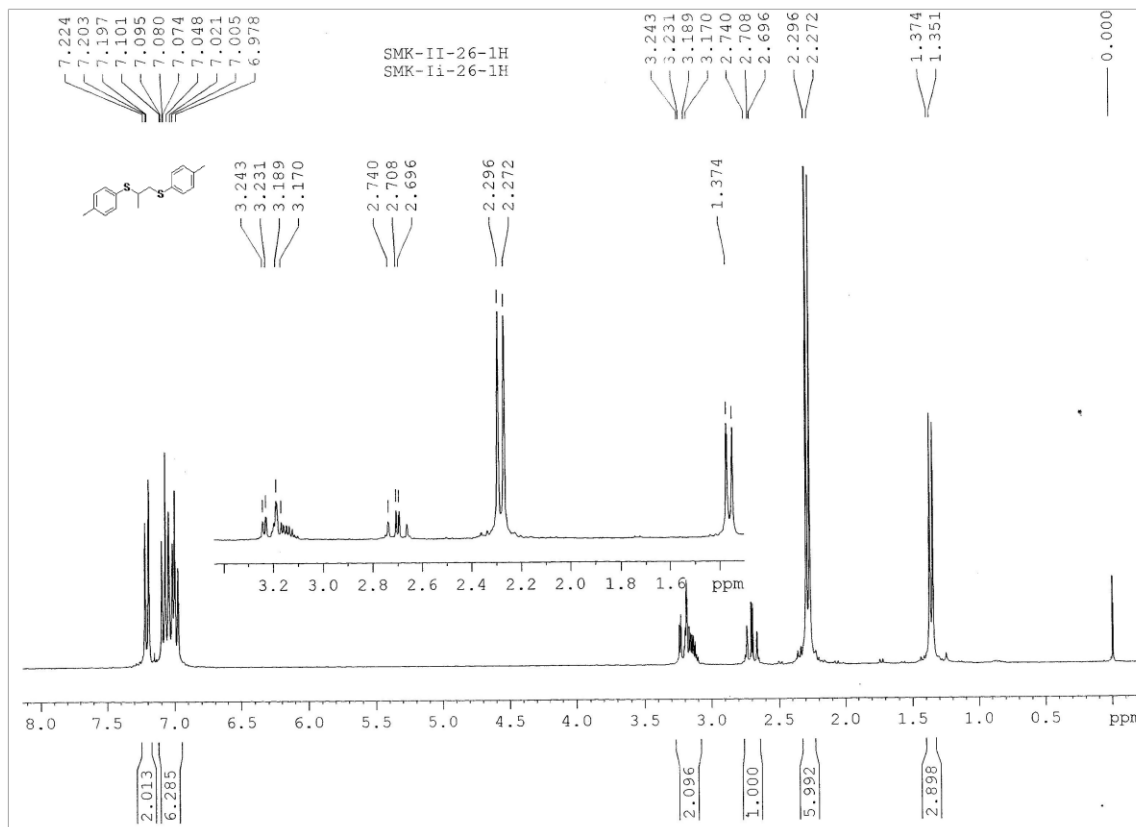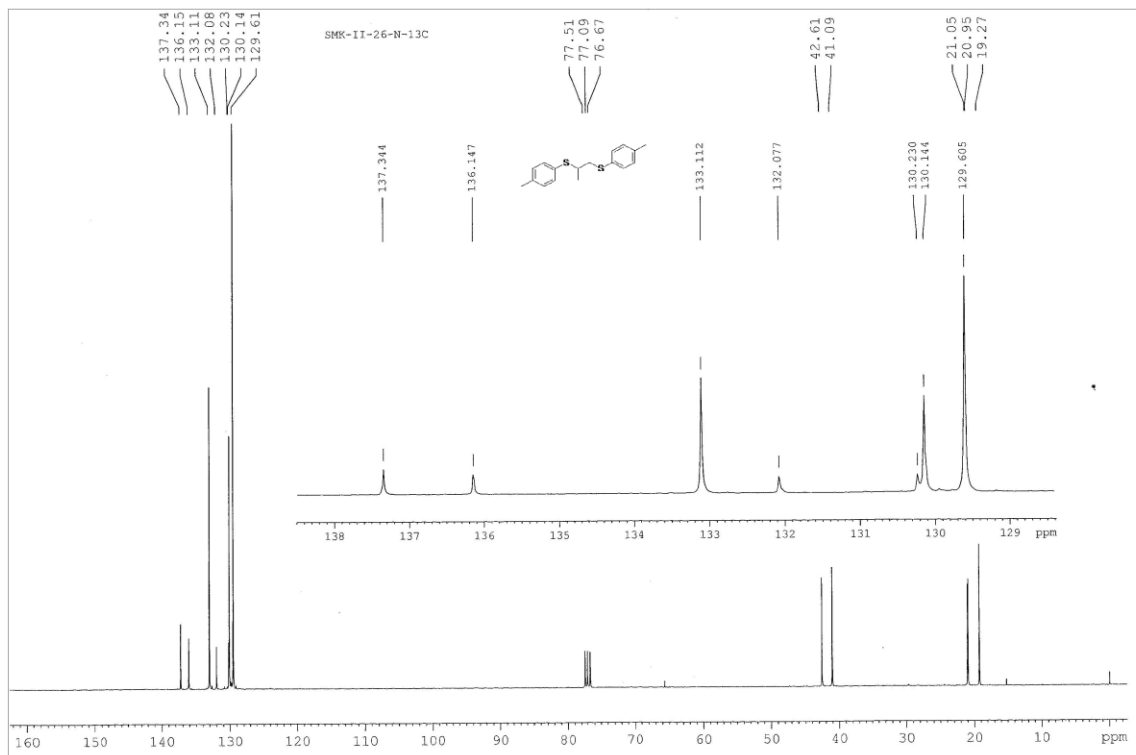

Table 2; Entry 4

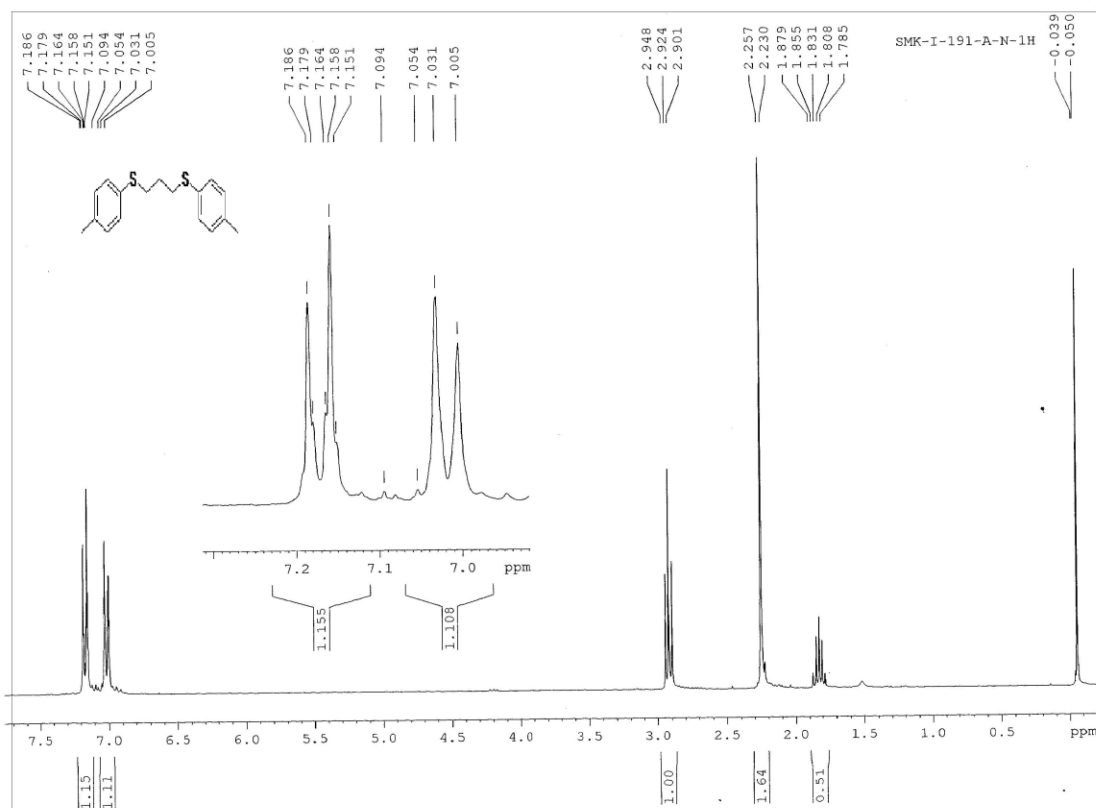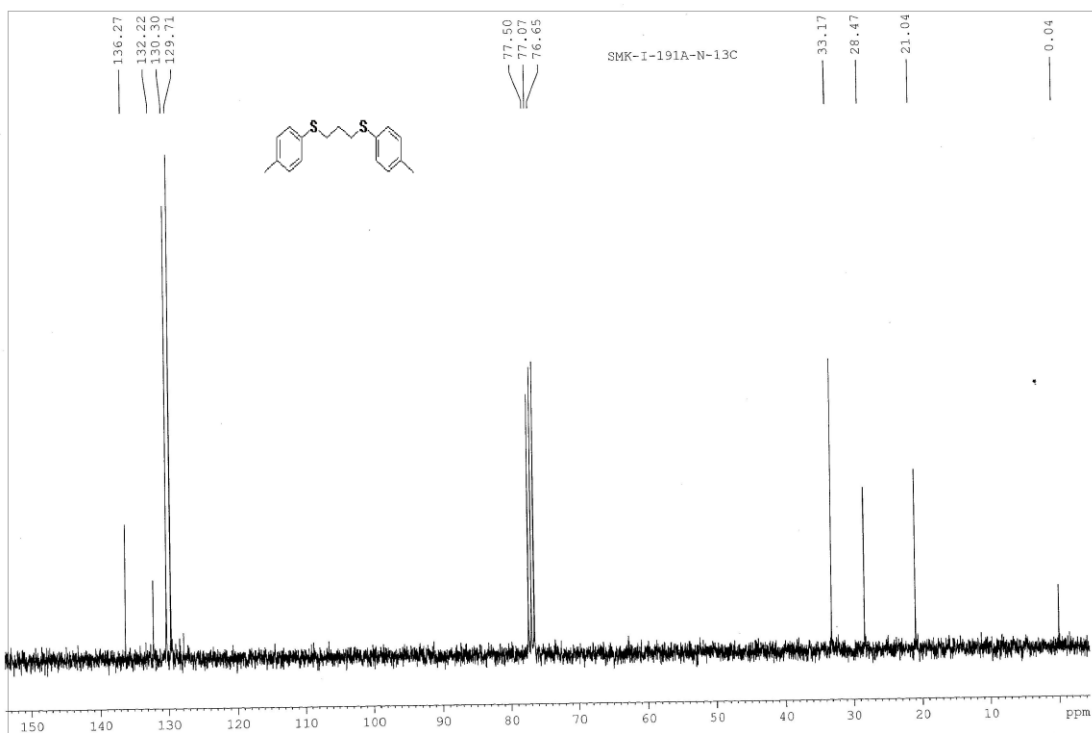

Table 2; Entry 5

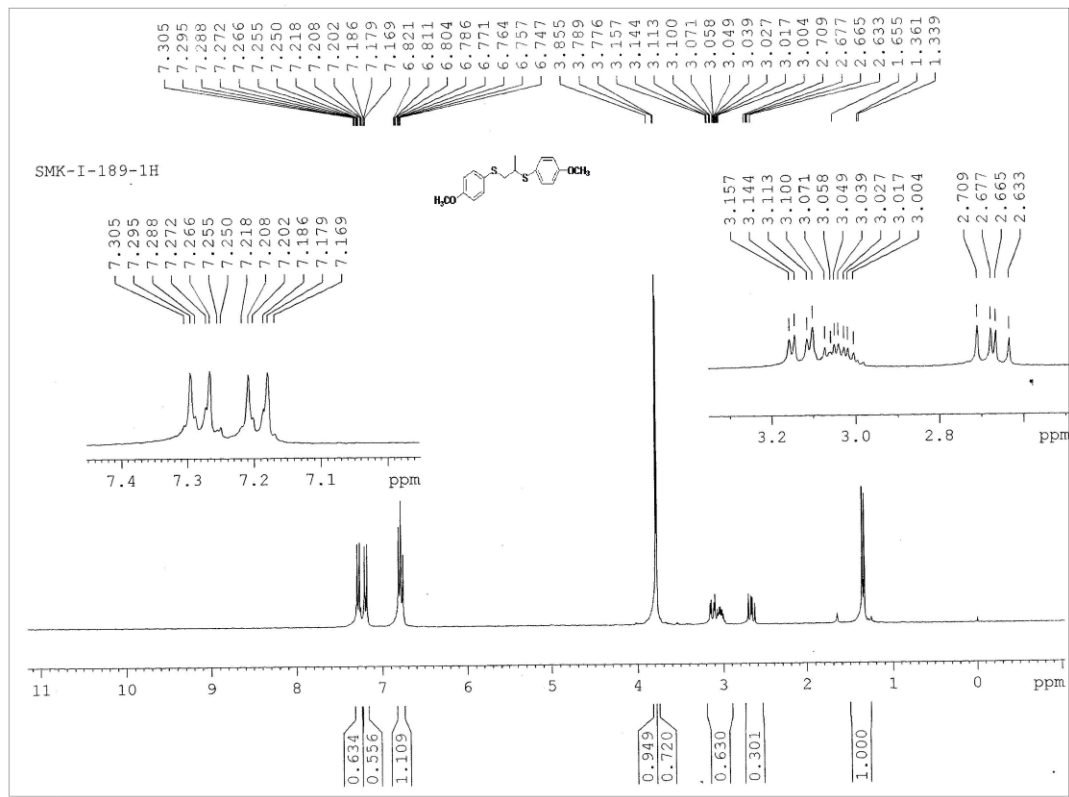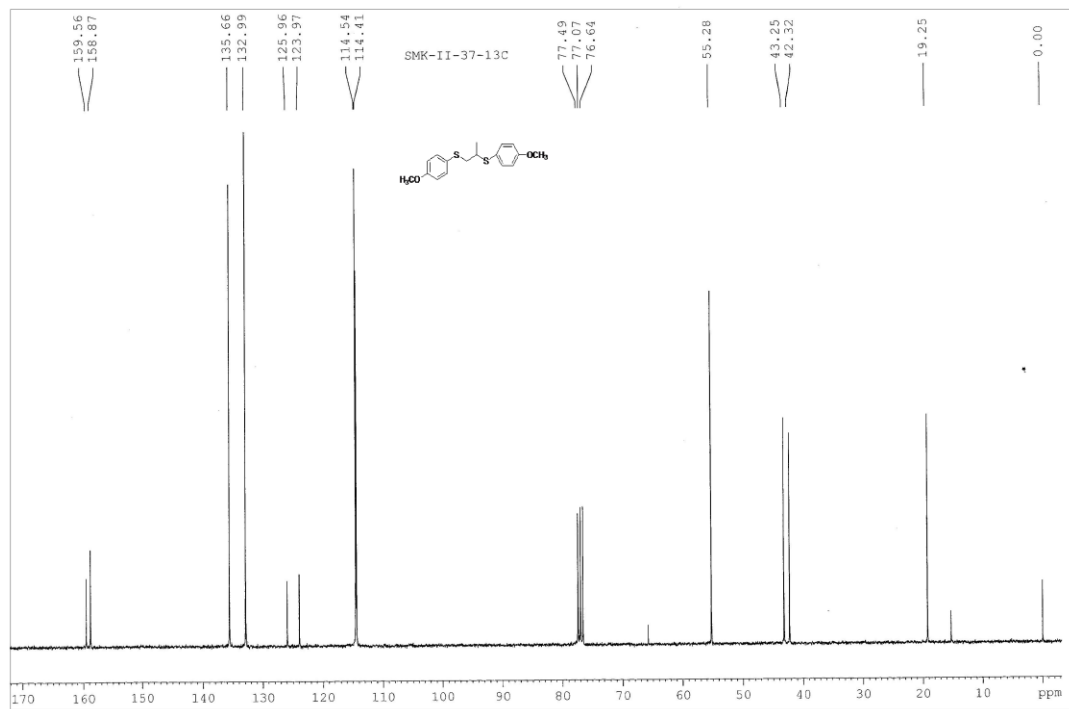

Table 2; Entry 6

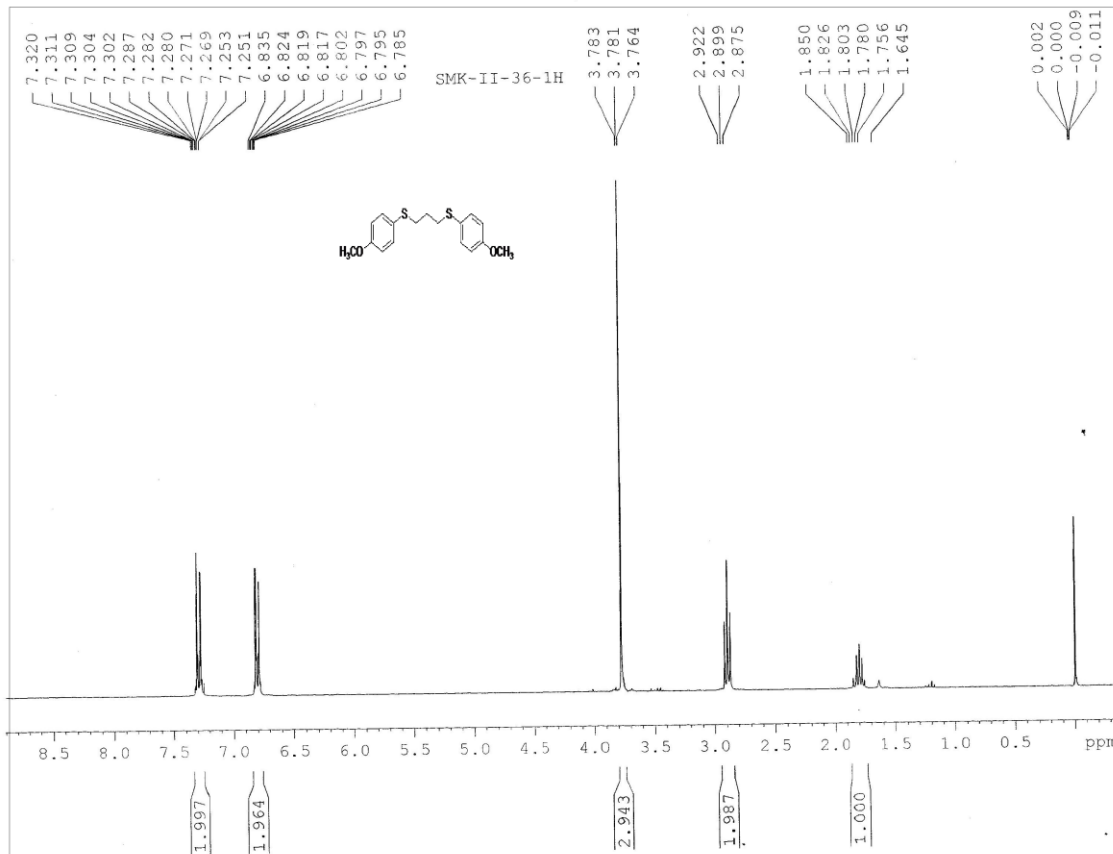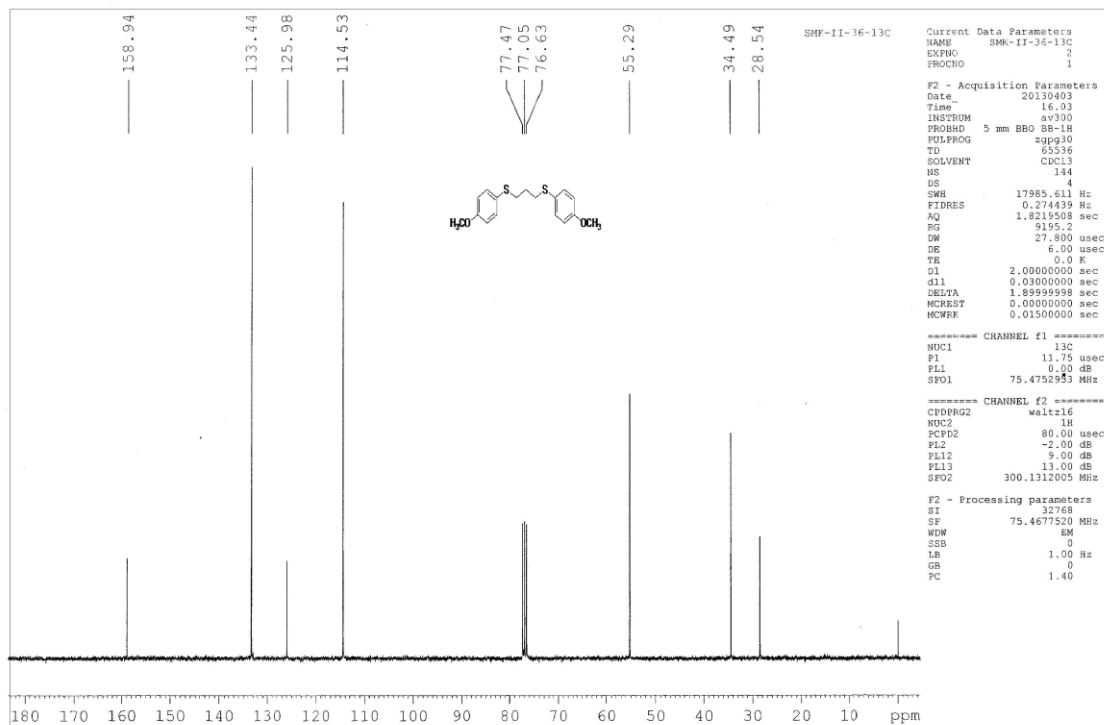

Table 2; Entry 7

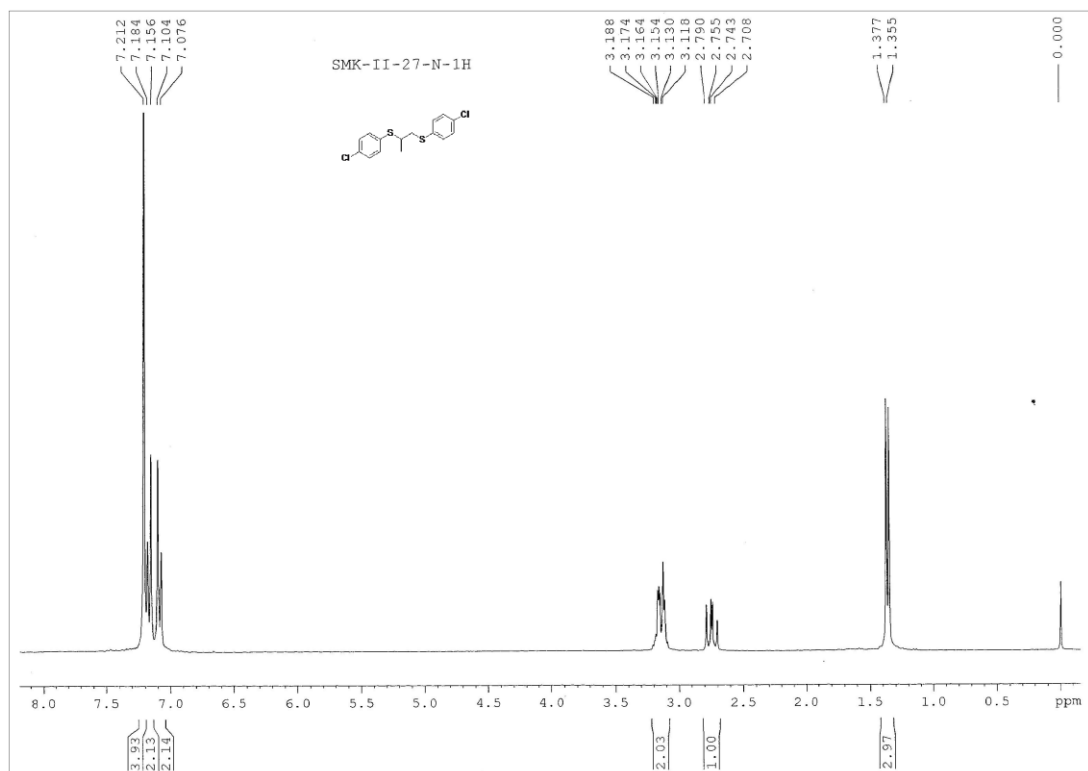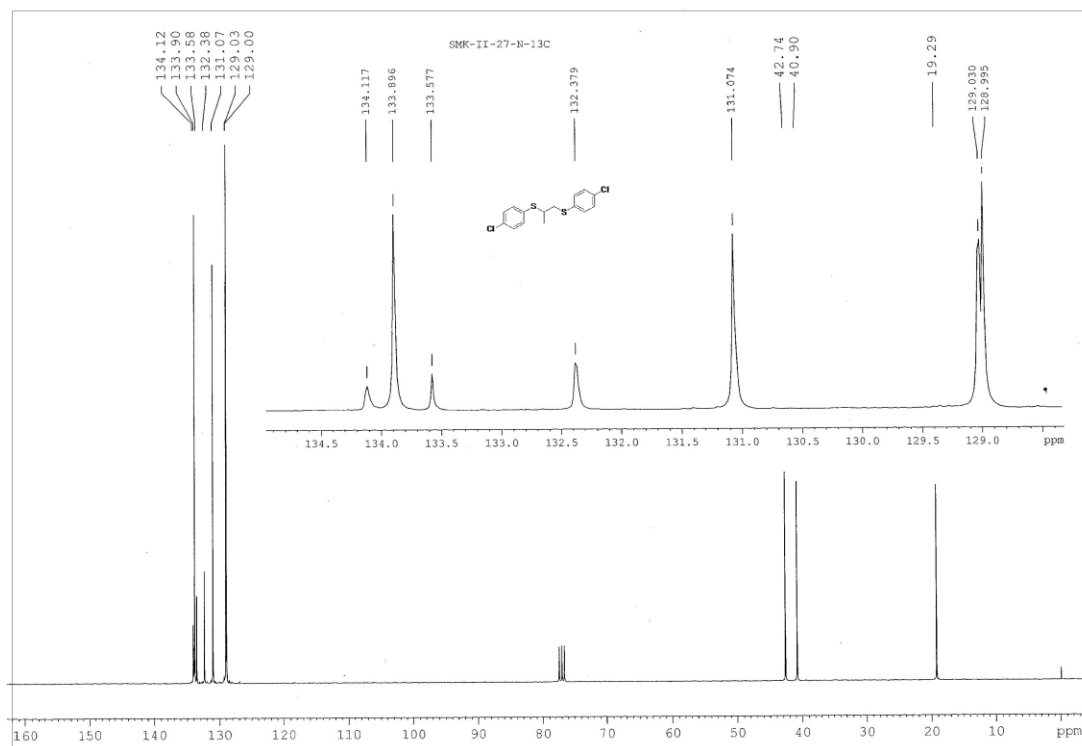



Table 2; Entry 8

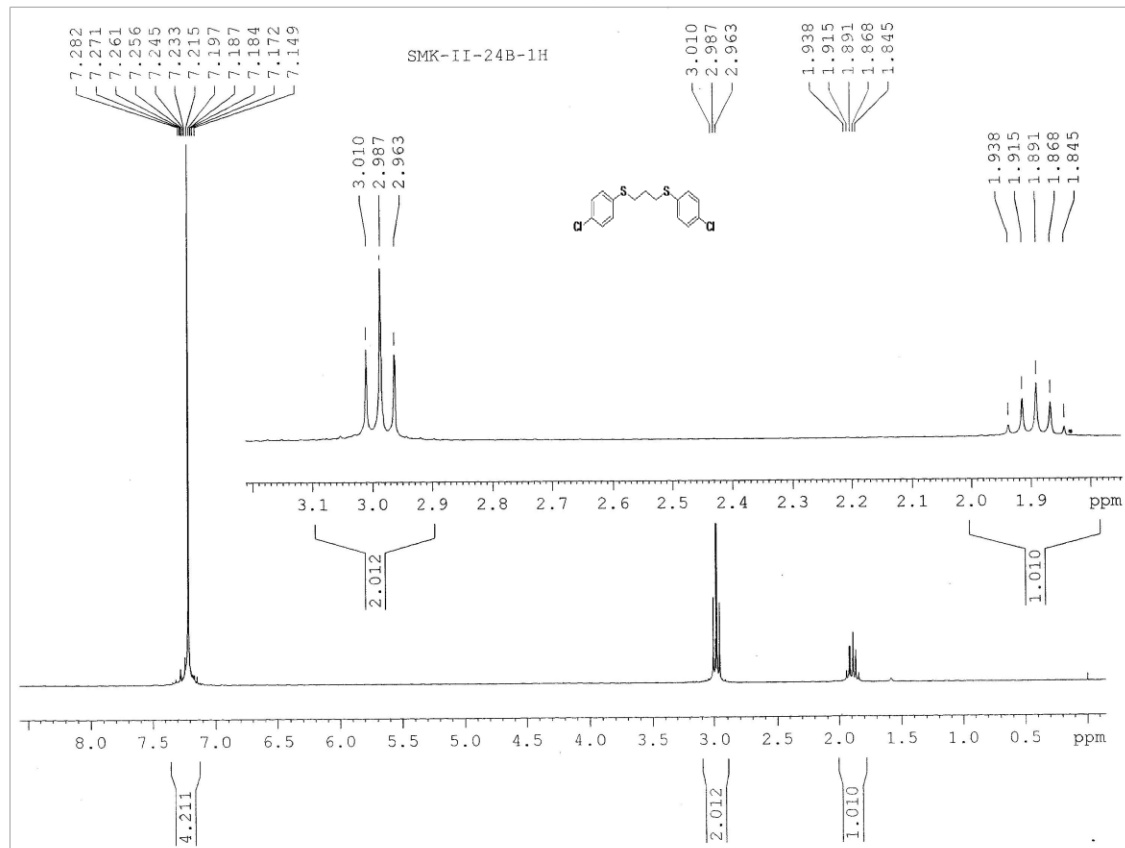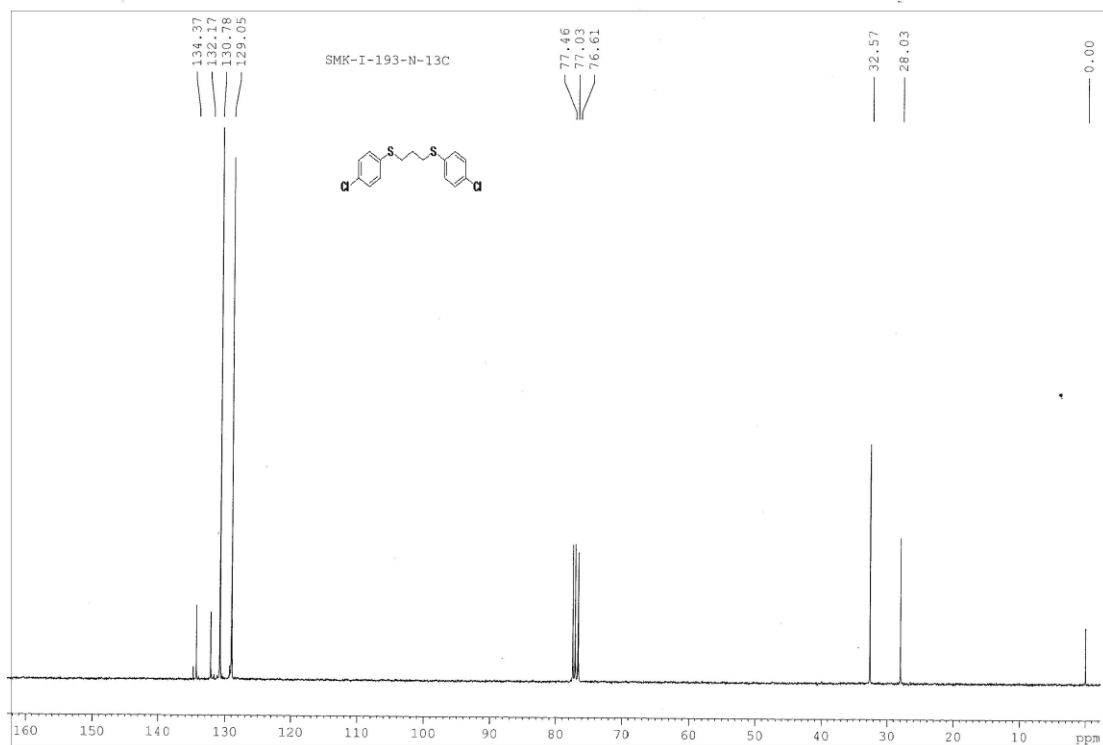

Table 2; Entry 9

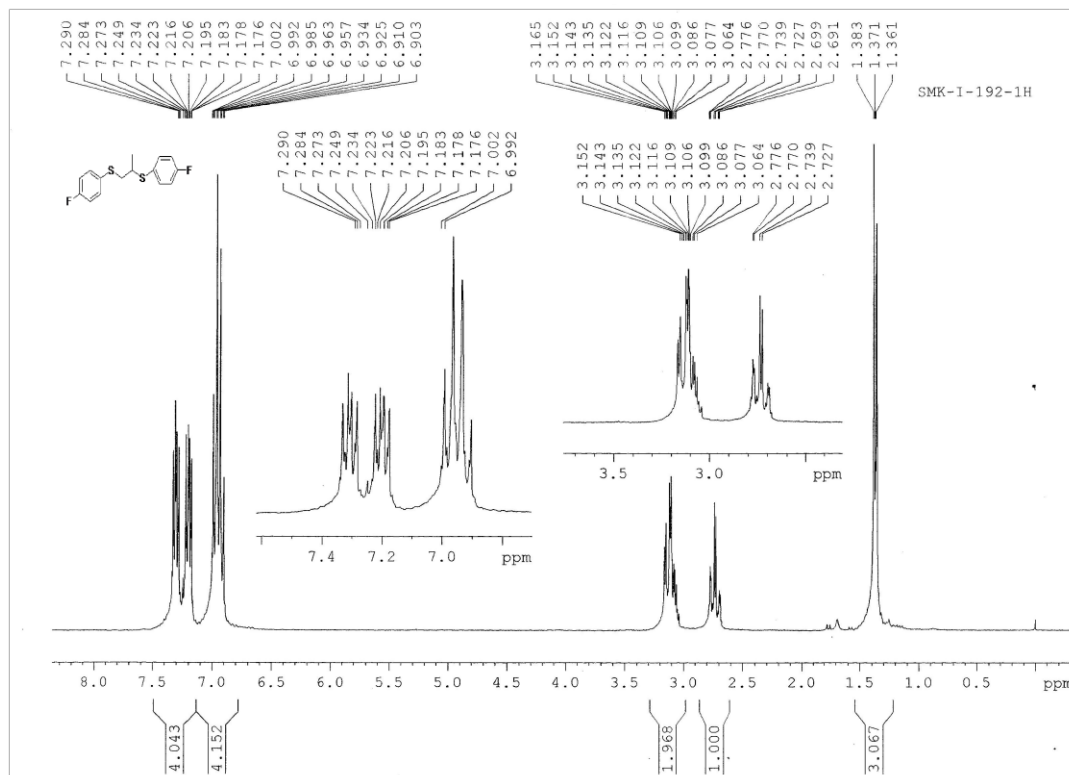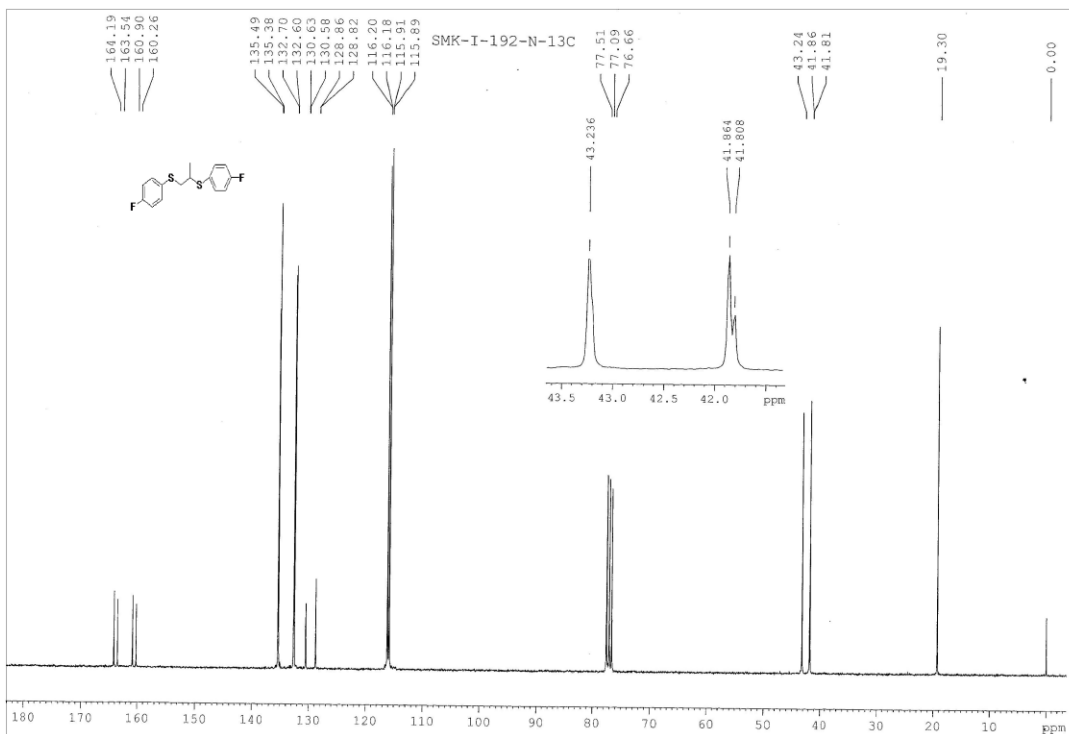

Table 2; Entry 10

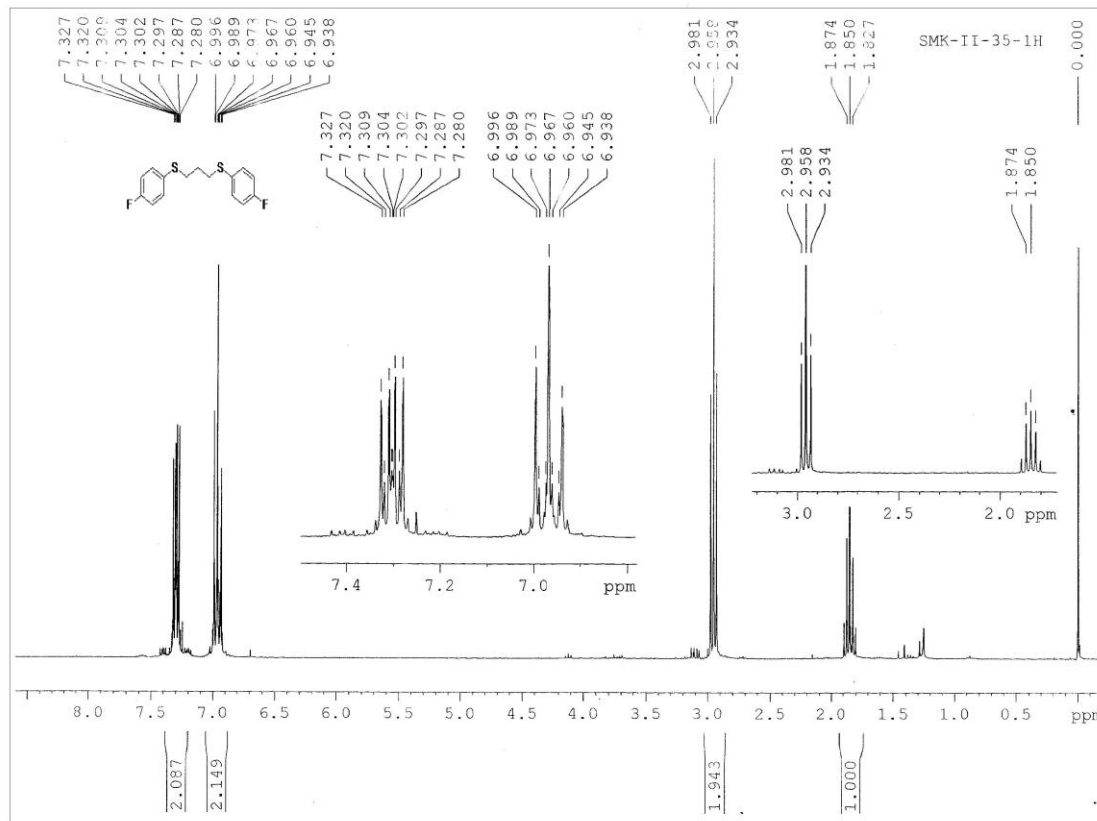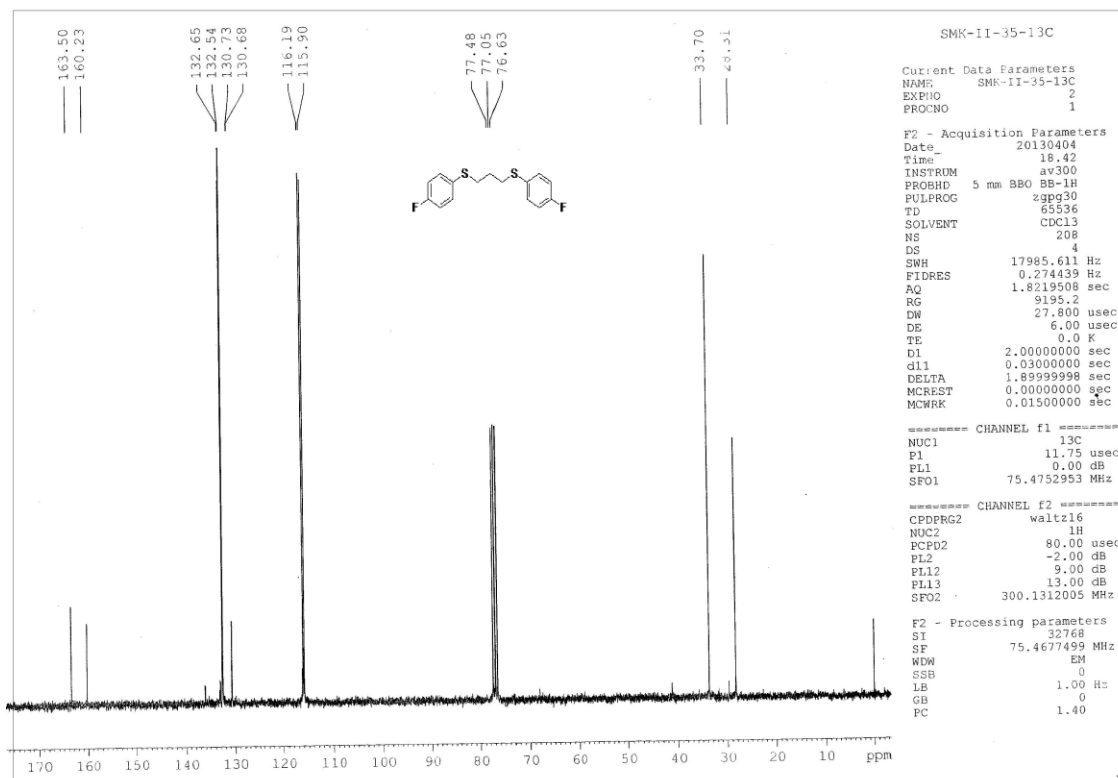

Table 2; Entry 11

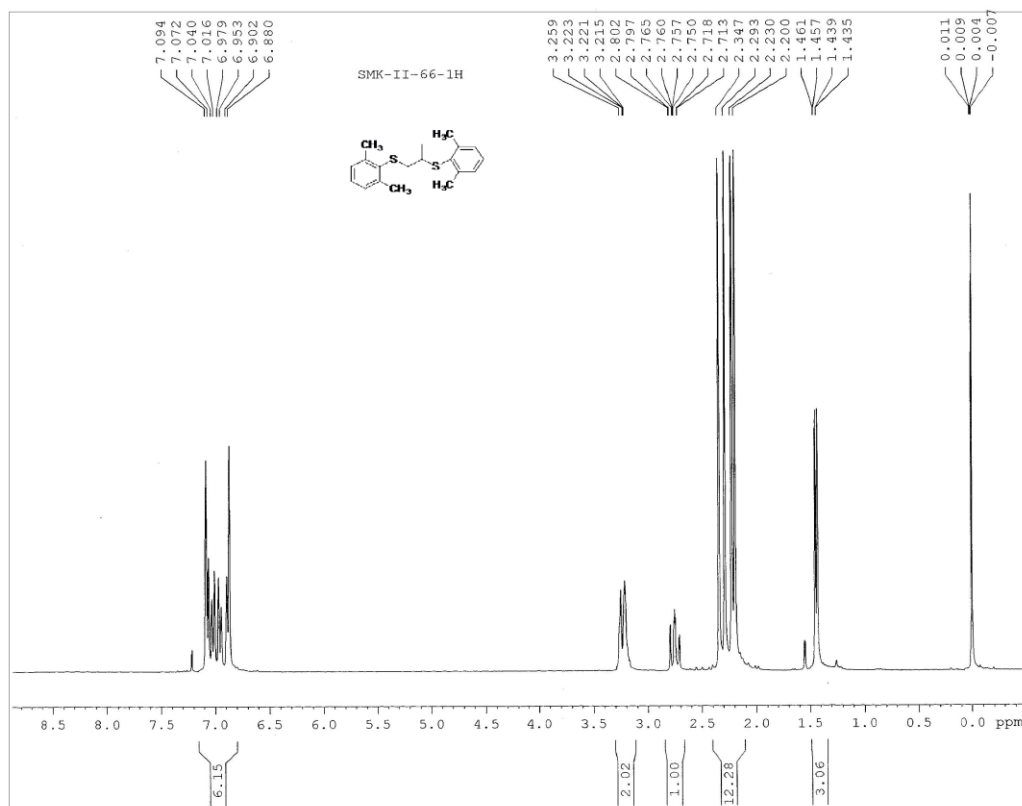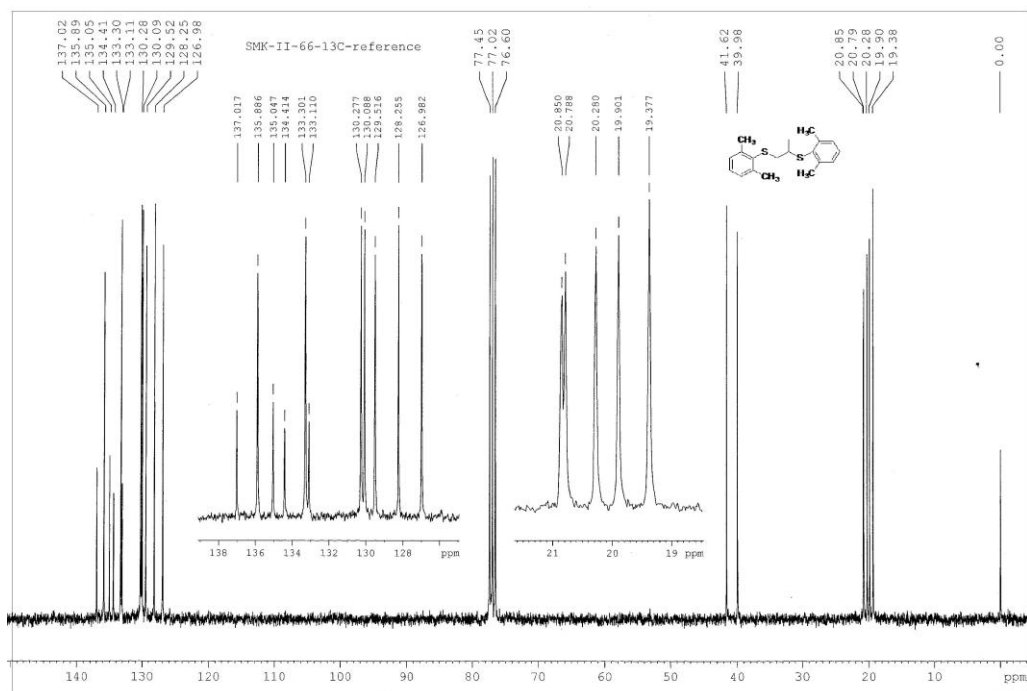

Table 2; Entry 12

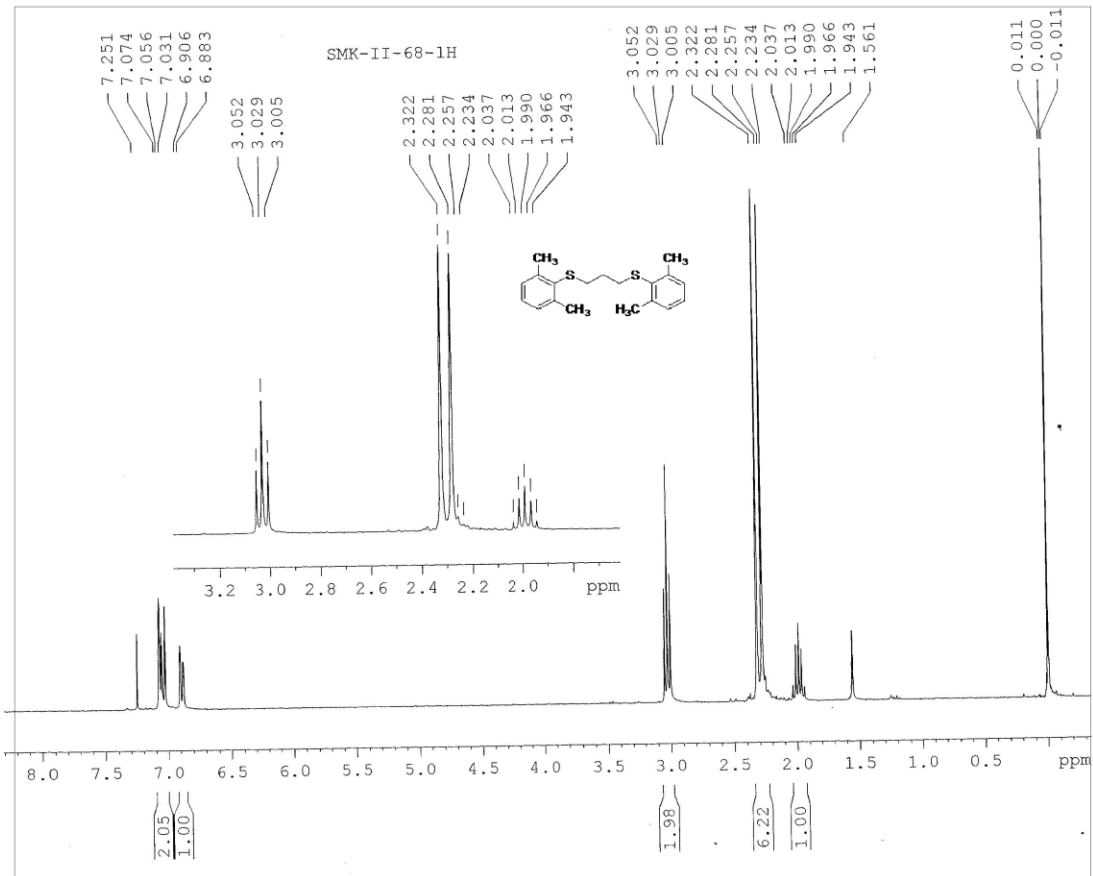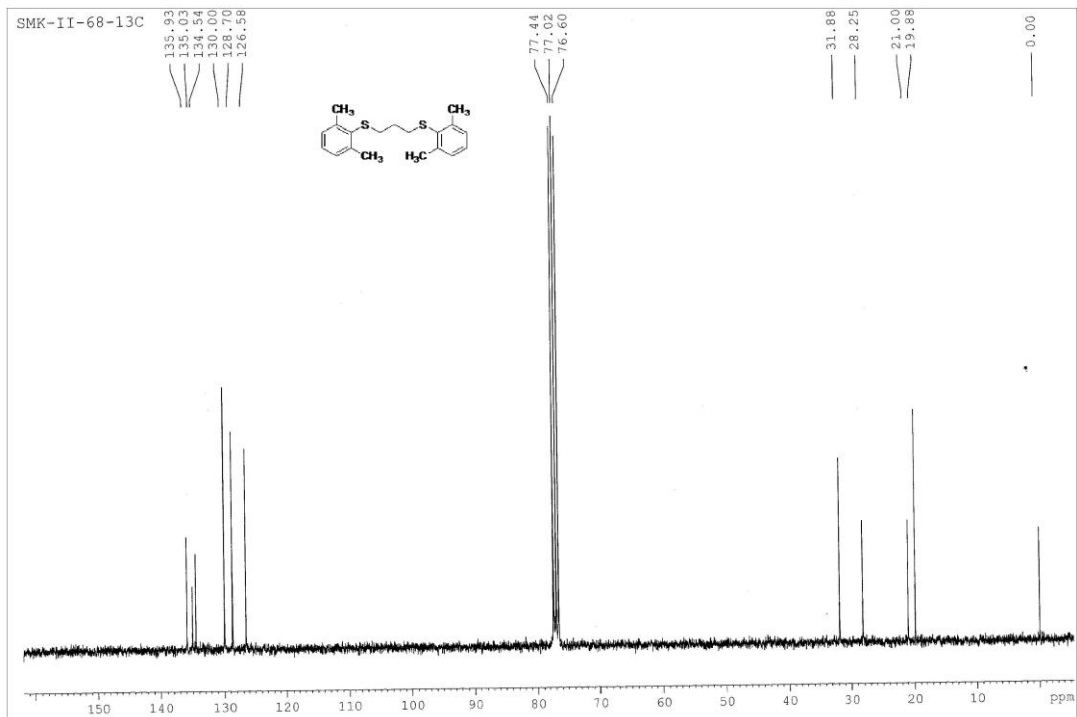

Table 2; Entry 13

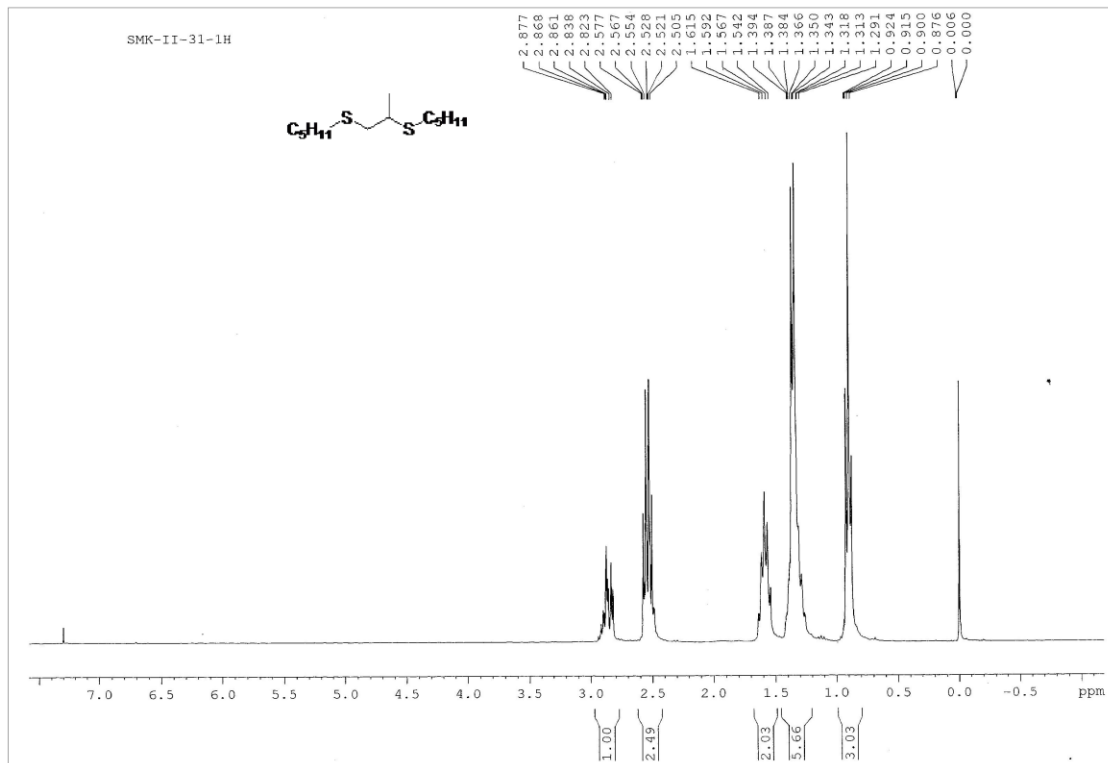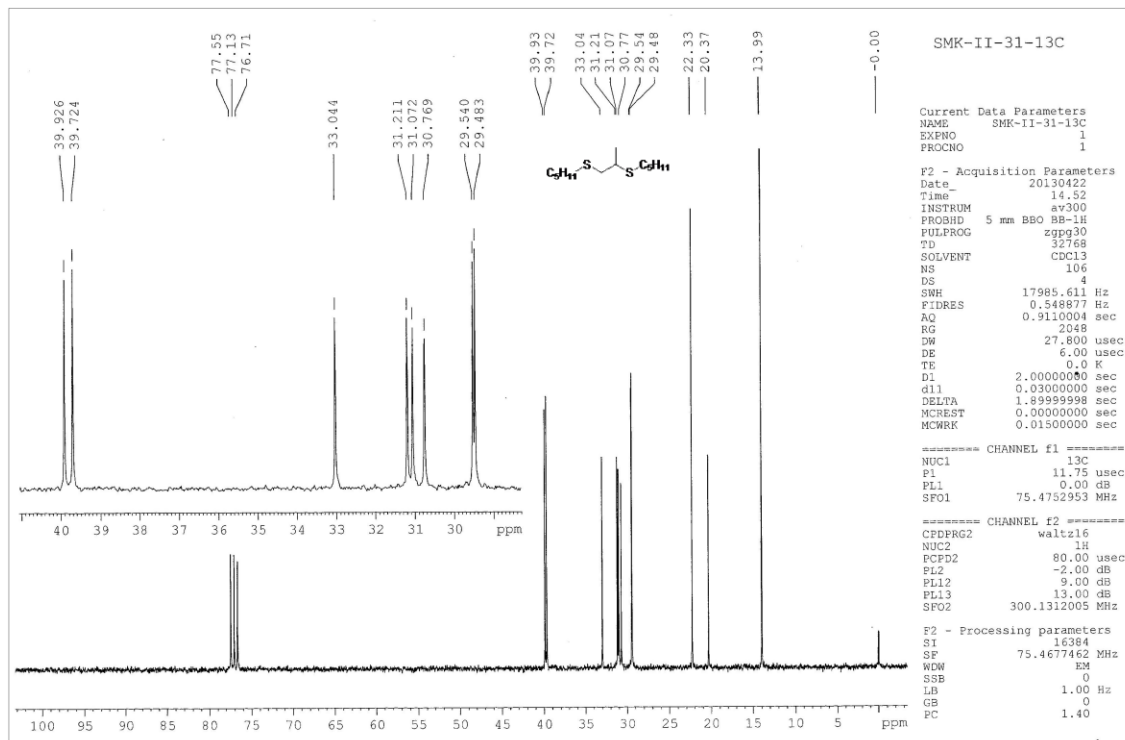

Table 2; Entry 14

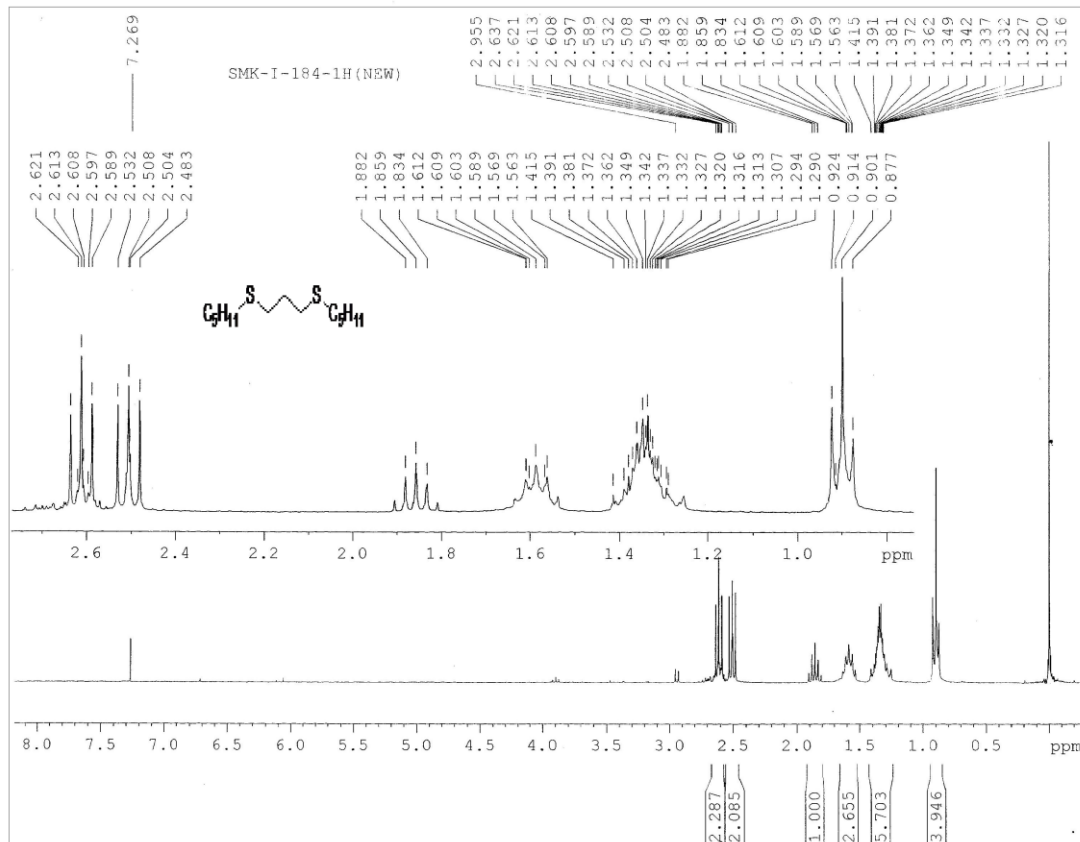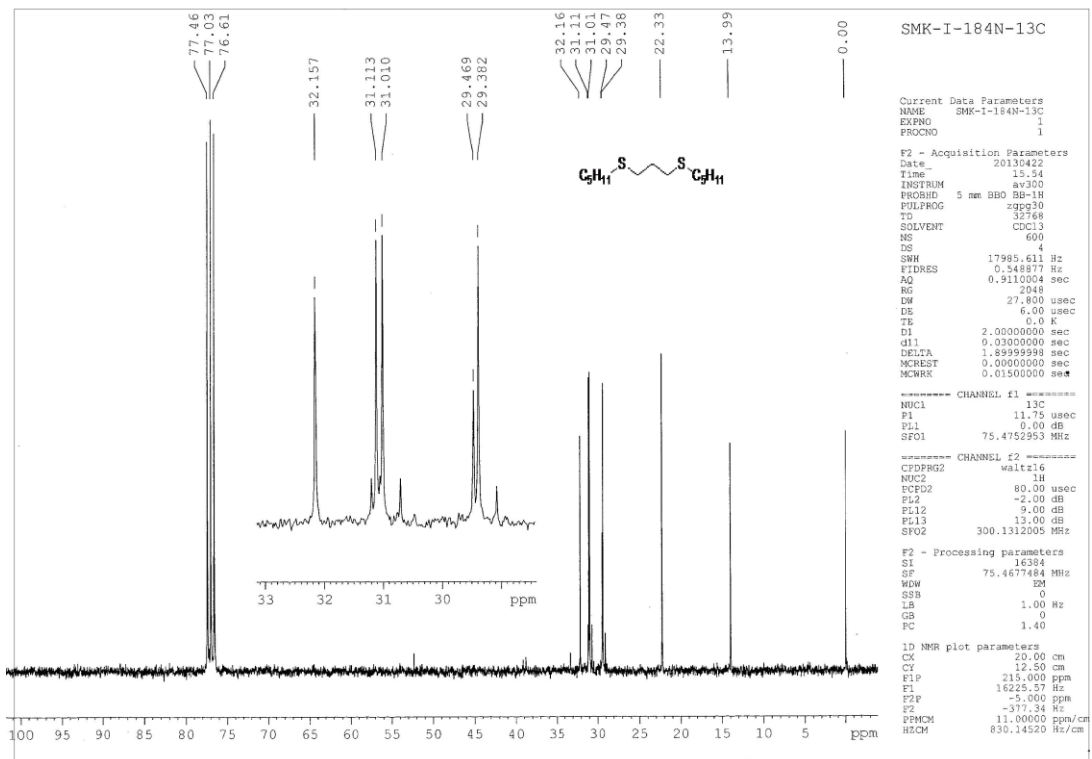

Table 2; Entry 15

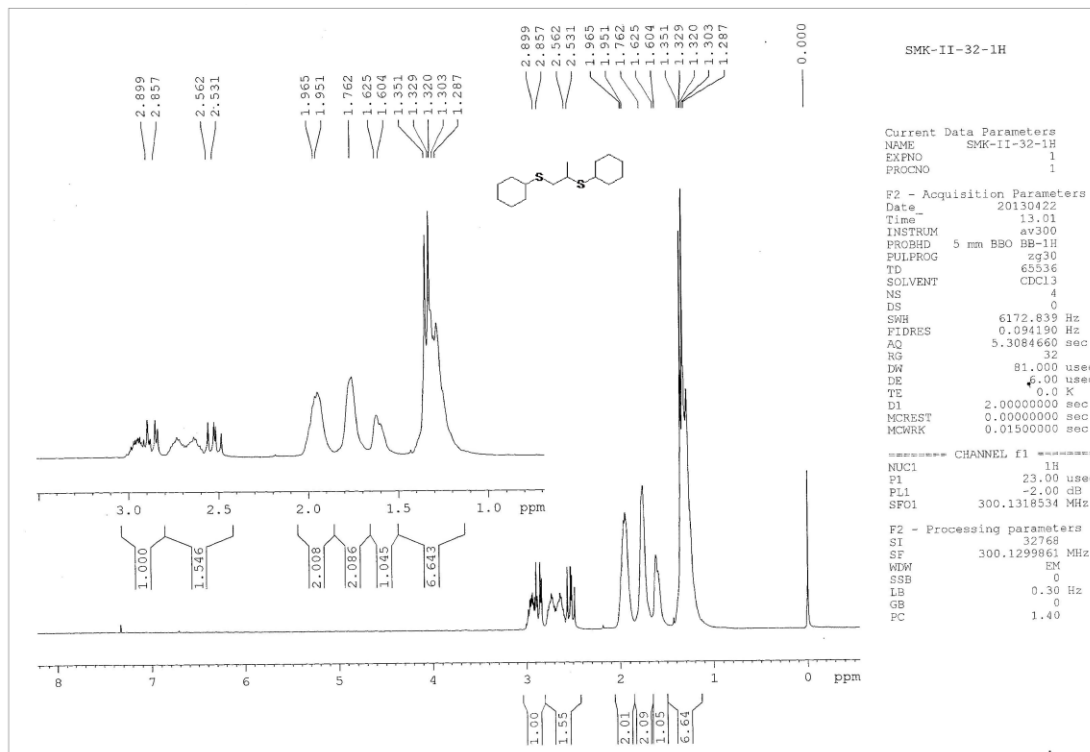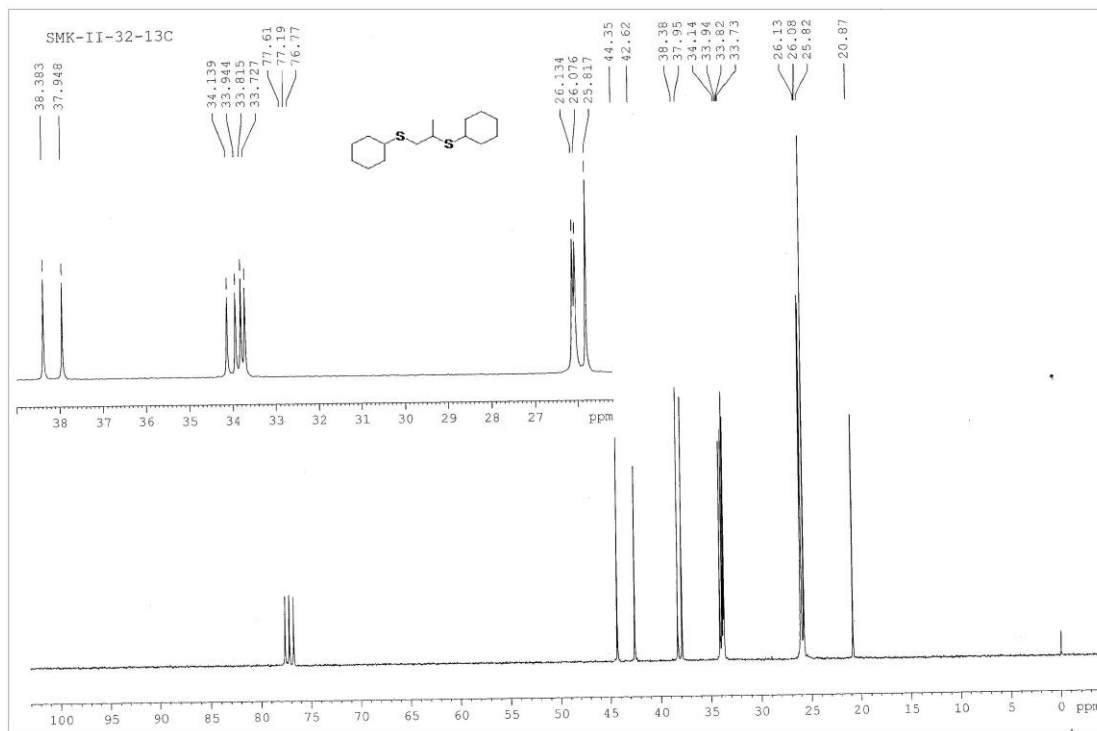



Table 2; Entry 16

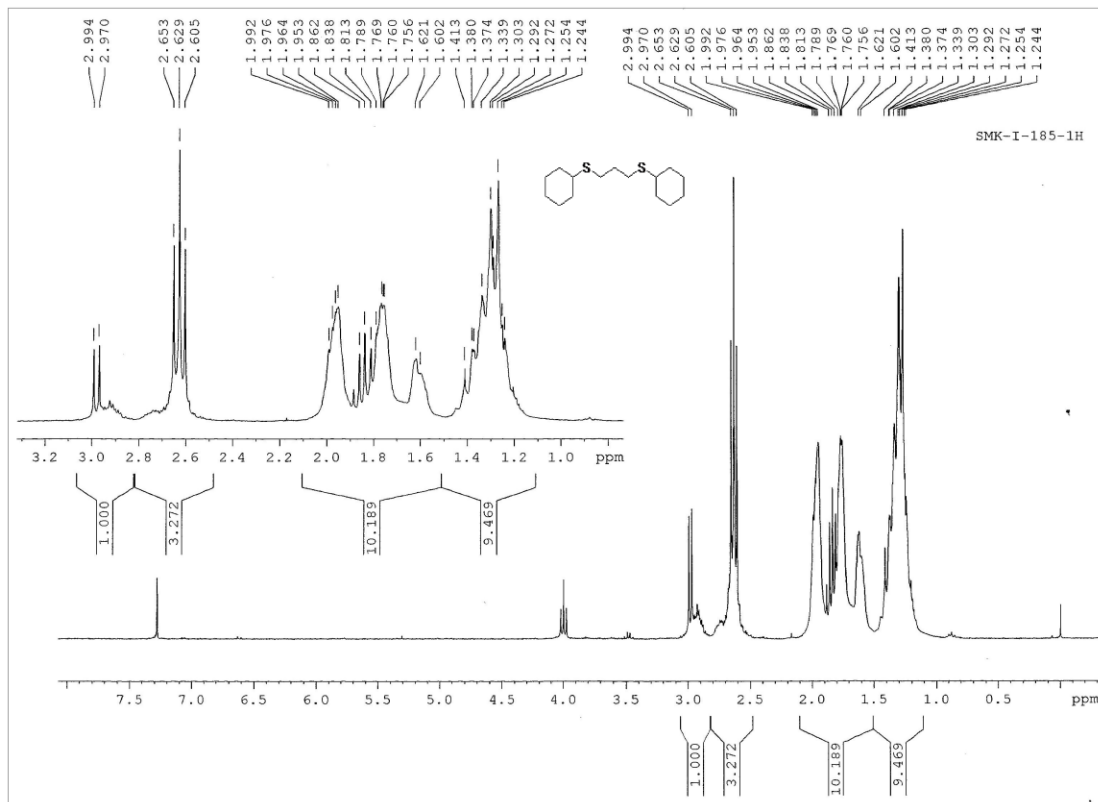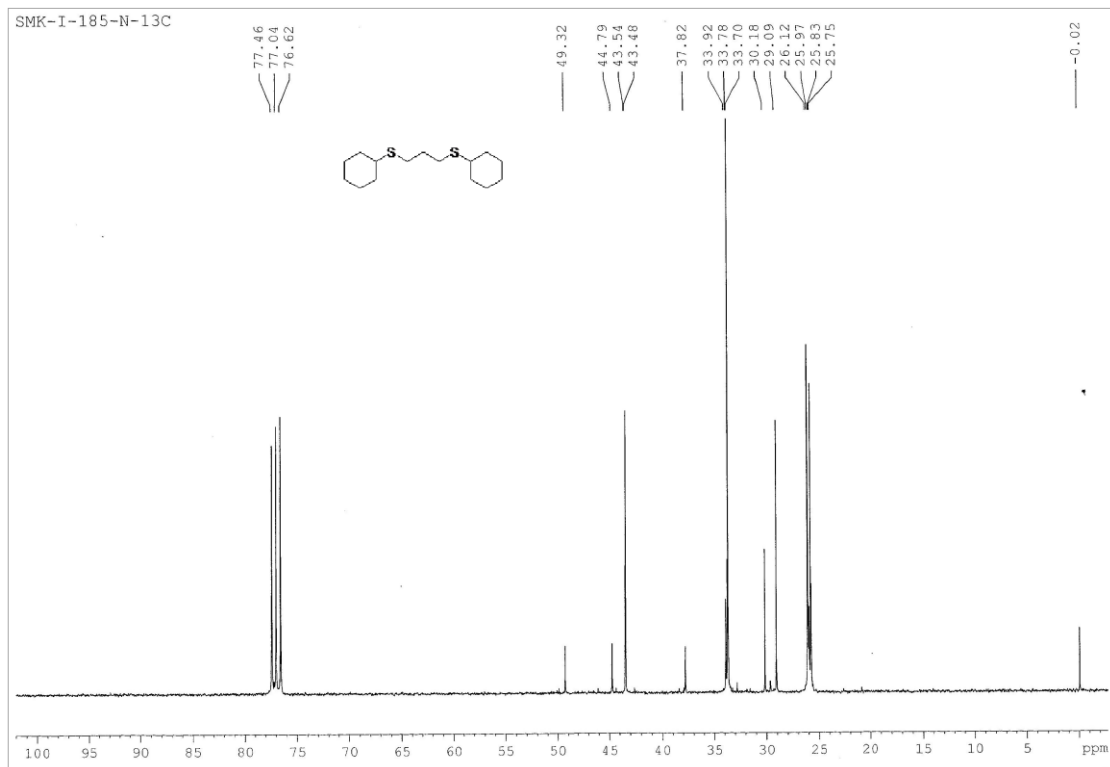

Table 2; Entry 17

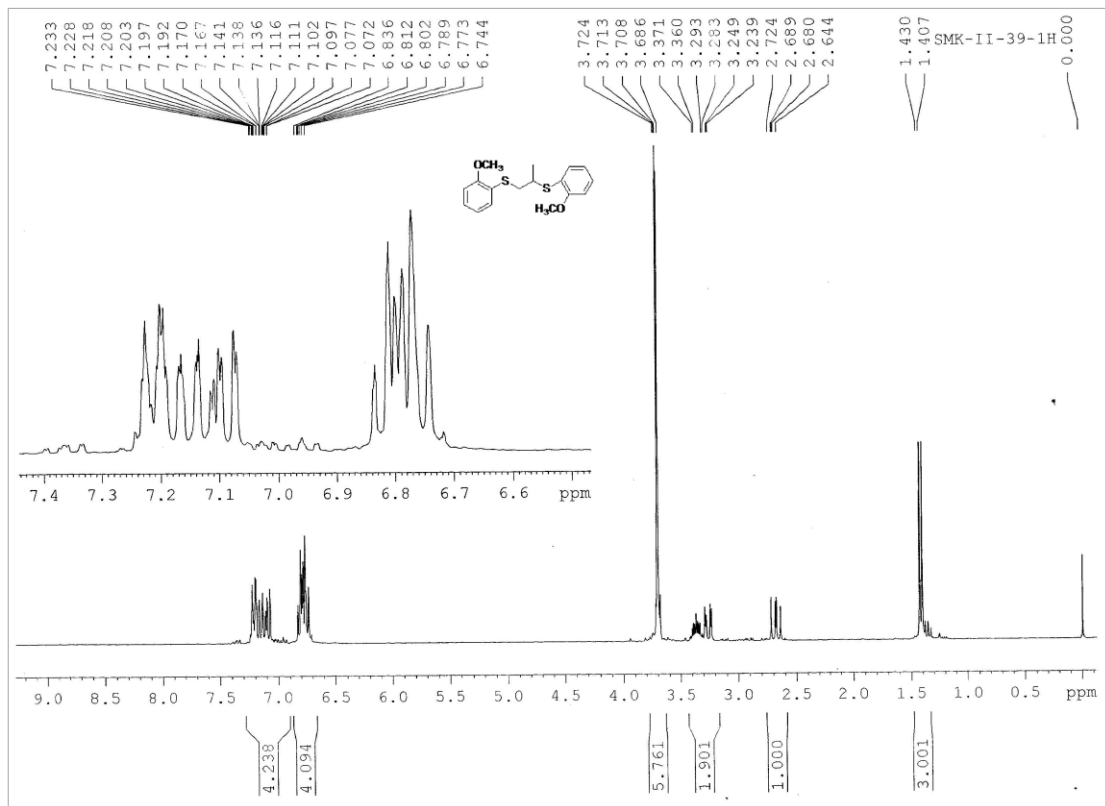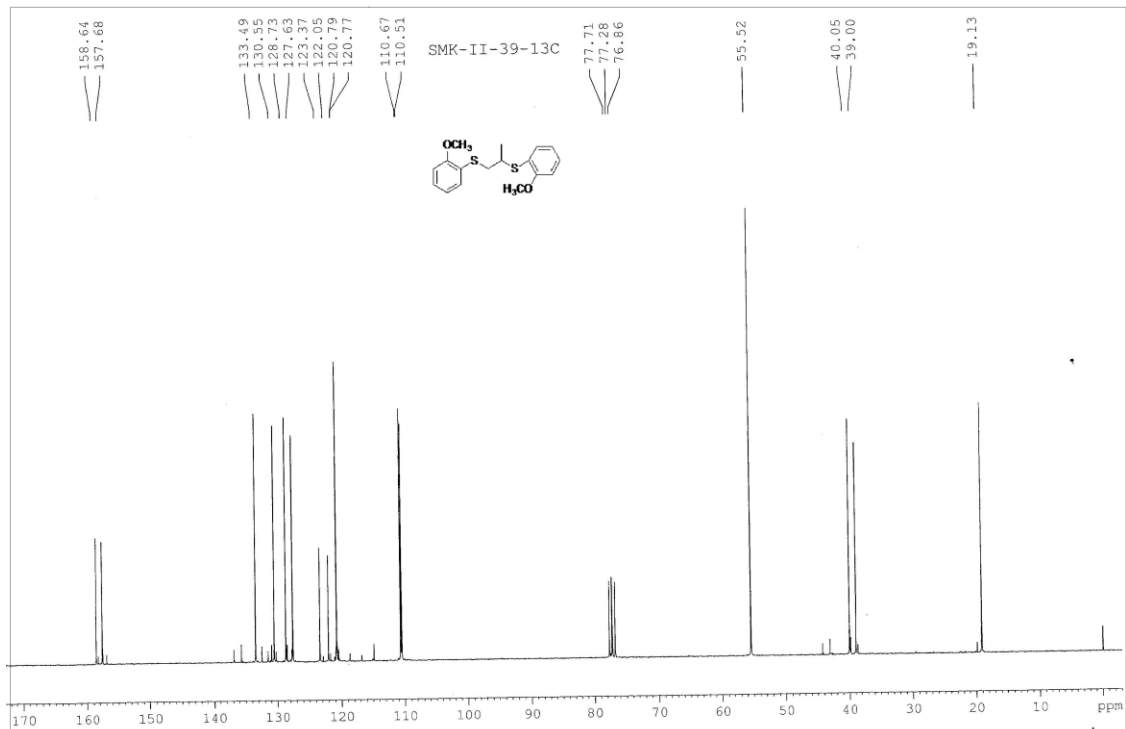

Table 2; Entry 18

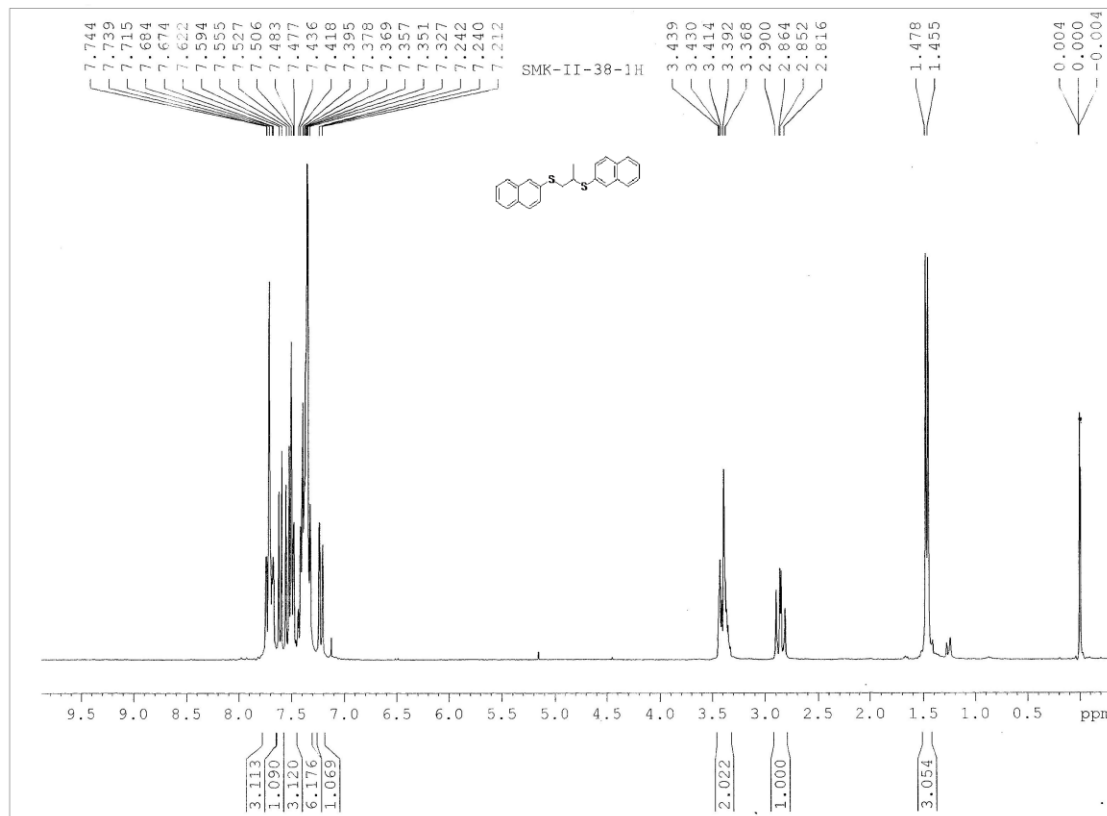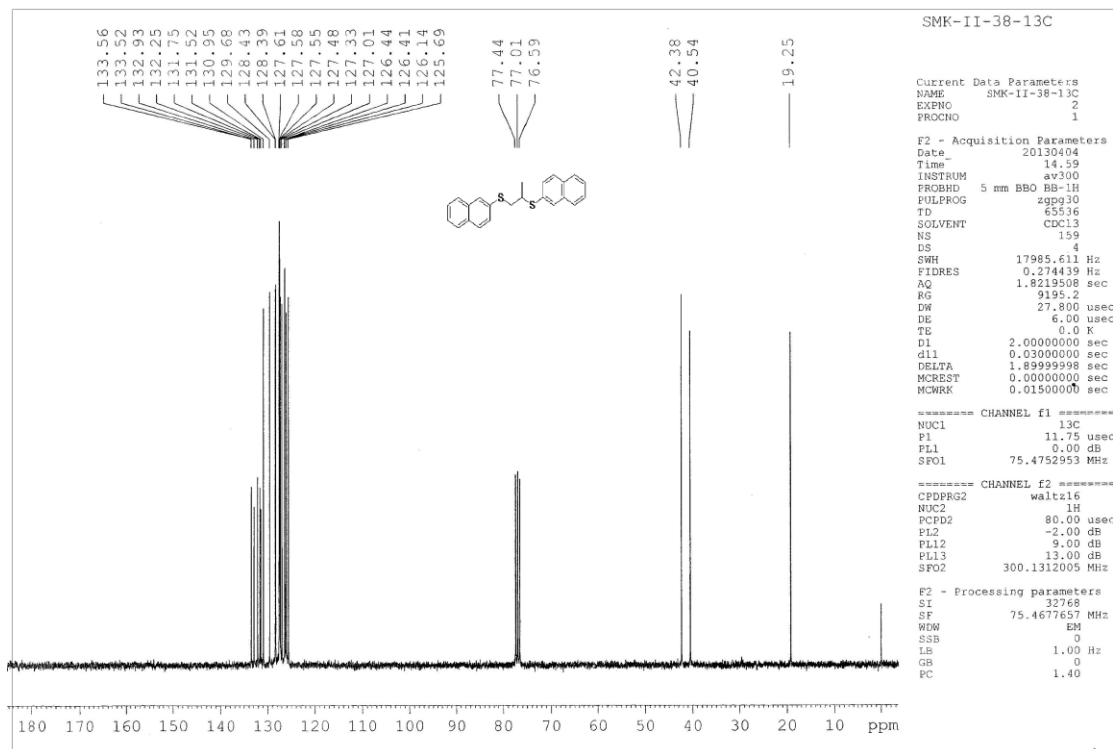

Table 2, Entry 19 (Mixture of 2-D-1,3-dithioether & the compound in Entry 2)

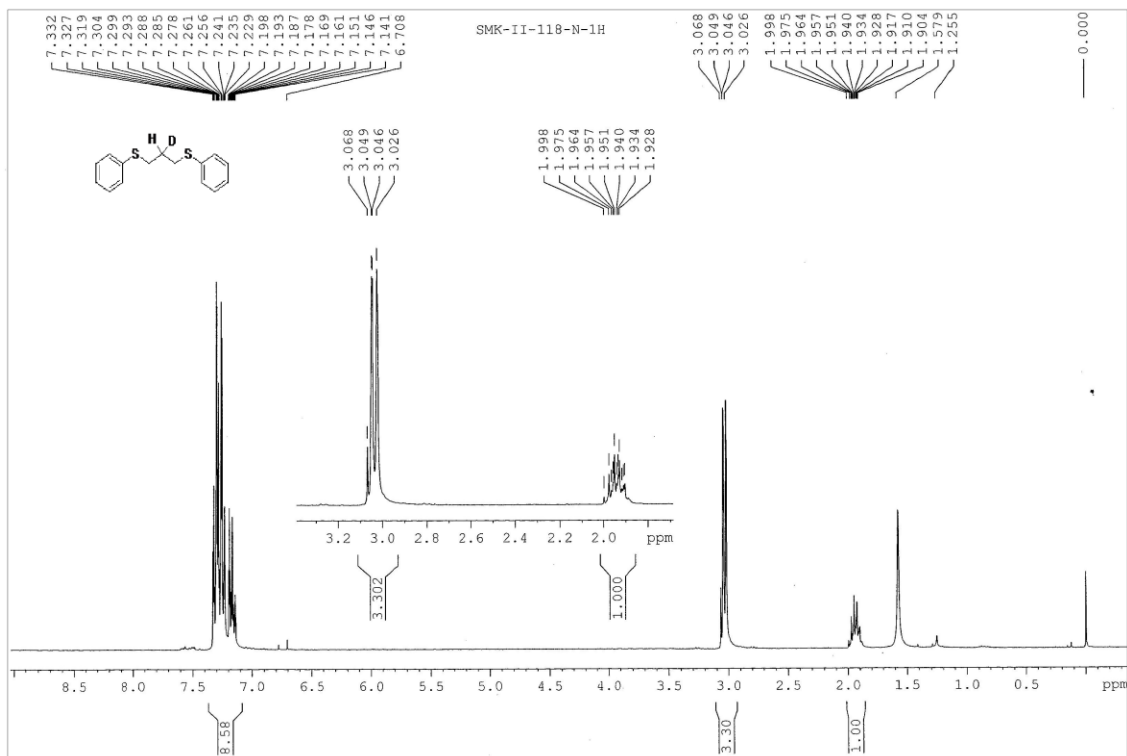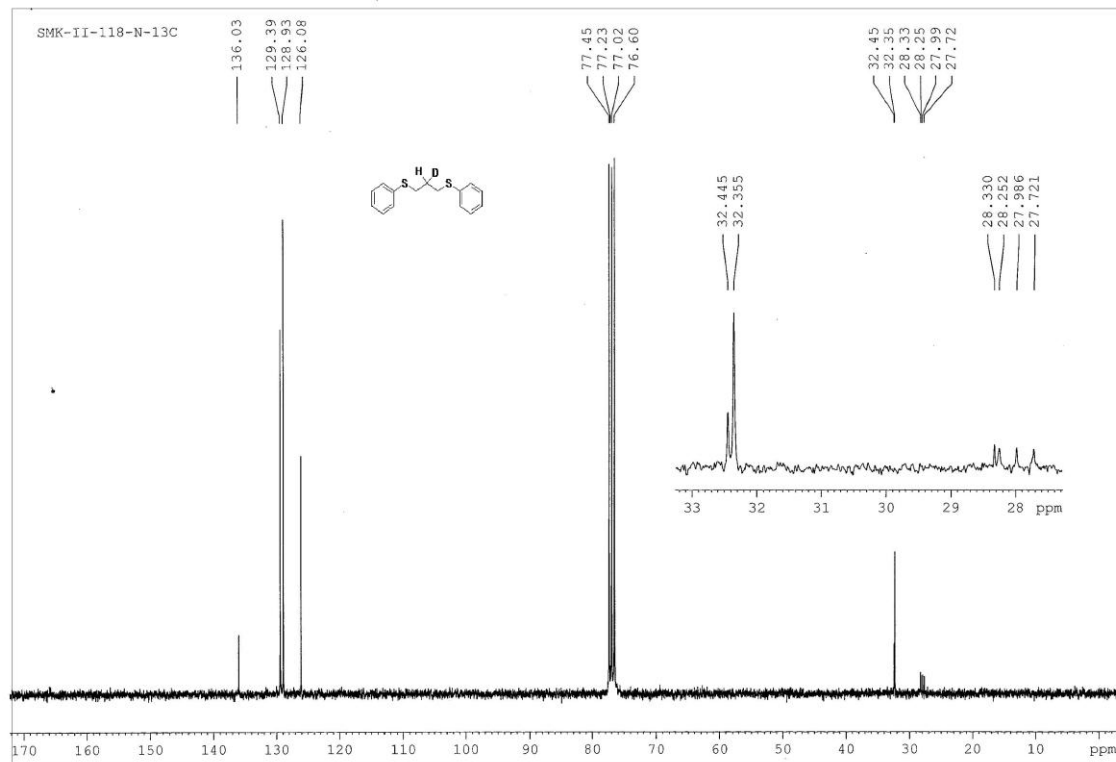

Supplement: Additional file 2 [file 1860-5397-10-5-S2.pdf]
