# Supplementary material for: Silica: An efficient catalyst for one-pot regioselective synthesis of dithioethers
Source: publisher site journal article supplement (doi:10.3762/bjoc.10.5), 2014-01-07
Supplement: Additional file 1 [file 1860-5397-10-5-S1.pdf]

# **Supporting Information**

**for**

## **Silica: An efficient catalyst for one-pot regioselective synthesis of dithioethers**

Samir Kundu<sup>1</sup>, Babli Roy<sup>1</sup> and Basudeb Basu\*<sup>1</sup>

Address: <sup>1</sup>Department of Chemistry, North Bengal University, Darjeeling 734013, India,

Fax: +91 353 2699001

Email: Basudeb Basu\* - basu\_nbu@hotmail.com

\*Corresponding author

**Characterization data for the compounds listed in**

**Table 2, entries 1–19**

## Characterization data for the compounds listed in Table 2 (entries 1–19)

### 1-(1-(Phenylthio)propan-2-ylthio)benzene [1],

Entry 1; Obtained as pale yellow liquid (elution with light petroleum).

IR (Nujol) 1581.5, 740.6, 690.5  $\text{cm}^{-1}$ ;  $^1\text{H}$  NMR ( $\text{CDCl}_3$ , 300 MHz):  $\delta$  1.40 (d,  $J = 6.2$  Hz, 3H,  $\text{CH}_3$ ), 2.72-2.80 (m, 1H, CH), 3.19-3.29 (m, 2H,  $\text{CH}_2$ ), 7.11-7.33 (m, 10H, ArH);  $^{13}\text{C}$  NMR ( $\text{CDCl}_3$ , 75 MHz):  $\delta$  19.2, 40.4, 42.3, 126.1, 127.2, 128.8, 129.5, 132.5, 133.9, 135.6; HRMS (ESI) calcd for  $\text{C}_{15}\text{H}_{16}\text{KS}_2$  299.0330; found 299.0331.

### 1-(3-(Phenylthio)propylthio)benzene [2],

Entry 2; Obtained as colourless liquid (elution with light petroleum).

IR (Nujol) 690.5, 736.8  $\text{cm}^{-1}$ ;  $^1\text{H}$  NMR ( $\text{CDCl}_3$ , 300 MHz):  $\delta$  1.93 (quintet,  $J = 6.9$  Hz, 2H,  $\text{CH}_2$ ), 3.02 (t,  $J = 6.9$  Hz, 4H,  $2\text{CH}_2$ ), 7.12-7.17 (m, 2H, ArH), 7.21-7.31 (m, 8H, ArH);  $^{13}\text{C}$  NMR ( $\text{CDCl}_3$ , 75 MHz):  $\delta$  28.2, 32.3, 126.0, 128.8, 129.2, 135.9; HRMS (ESI) calcd for  $\text{C}_{15}\text{H}_{16}\text{KS}_2$  299.0330; found 299.0331.

### 1-(2-(*p*-Tolylthio)propylthio)-4-methylbenzene,

Entry 3; Obtained as pale yellow liquid (elution with light petroleum).

IR (Nujol) 1492.8, 802.3, 721.3  $\text{cm}^{-1}$ ;  $^1\text{H}$  NMR ( $\text{CDCl}_3$ , 300 MHz):  $\delta$  1.36 (d,  $J = 6.9$  Hz, 3H,  $\text{CH}_3$ ), 2.27 (s, 3H, Ar $\text{CH}_3$ ), 2.30 (s, 3H, Ar $\text{CH}_3$ ), 2.70-2.74 (m, 1H, CH), 3.17-3.24 (m, 2H,  $\text{CH}_2$ ), 6.98-7.22 (m, 6H, ArH), 7.21 (d,  $J = 8.1$  Hz, 2H, ArH);  $^{13}\text{C}$  NMR ( $\text{CDCl}_3$ , 75 MHz):  $\delta$  19.2, 20.9, 21.0, 41.0, 42.5, 129.5, 130.0, 130.1, 132.0, 133.0, 136.1, 137.2; HRMS (ESI) calcd for  $\text{C}_{17}\text{H}_{20}\text{KS}_2$  327.0643; found 327.0645.

### 1-(3-(*p*-Tolylthio)propylthio)-4-methylbenzene,

Entry 4; Obtained as colourless liquid (elution with light petroleum).

IR (Nujol) 1492.8, 1091.6, 1018.3, 802.3, 721.3, 505.3  $\text{cm}^{-1}$ ;  $^1\text{H}$  NMR ( $\text{CDCl}_3$ , 300 MHz):  $\delta$  1.83 (qnt,  $J = 6.9$  Hz, 2H,  $\text{CH}_2$ ), 2.26 (s, 6H,  $2\text{ArCH}_3$ ), 2.92 (t,  $J = 6.9$  Hz, 4H,  $2\text{CH}_2$ ), 7.02 (d,  $J = 7.8$  Hz, 4H, ArH), 7.17 (d,  $J = 8.4$  Hz, 4H, ArH);  $^{13}\text{C}$  NMR ( $\text{CDCl}_3$ , 75 MHz):  $\delta$  21.0, 28.4, 33.1, 129.6, 130.2, 132.1, 136.2; HRMS (ESI) calcd for  $\text{C}_{17}\text{H}_{20}\text{KS}_2$  327.0643; found 327.0644.

### 1-(1-(4-Methoxyphenylthio)propan-2-ylthio)-4-methoxybenzene,

Entry 5; Obtained as colourless liquid (elution with 3% ethyl acetate - light petroleum).

IR (Nujol) 1593.1, 1492.8, 1284.5, 1245.9, 1176.5, 1099.3, 1033.8, 1006.8, 825.5, 640.0, 524.6  $\text{cm}^{-1}$ ;  $^1\text{H}$  NMR ( $\text{CDCl}_3$ , 300 MHz):  $\delta$  1.35 (d,  $J = 6.6$  Hz, 3H,  $\text{CH}_3$ ), 2.63-2.71 (m, 1H, CH), 3.00-3.16 (m, 2H,  $\text{CH}_2$ ), 3.78 (s, 3H,  $\text{OCH}_3$ ), 3.79 (s, 3H,  $\text{OCH}_3$ ), 6.75-6.82 (m, 4H, ArH), 7.17-7.22 (m, 2H, ArH), 7.25-7.30 (m, 2H, ArH);  $^{13}\text{C}$  NMR ( $\text{CDCl}_3$ , 75 MHz):  $\delta$  19.2, 42.2, 43.2, 55.2, 114.3, 114.5, 123.9, 125.9, 132.9, 135.6, 158.8, 159.5; HRMS (ESI) calcd for  $\text{C}_{17}\text{H}_{20}\text{O}_2\text{KS}_2$  359.0542; found 359.0543.

**1-(3-(4-Methoxyphenylthio)propylthio)-4-methoxybenzene,**

Entry 6; Obtained as colourless liquid (elution with 3% ethyl acetate - light petroleum).

IR (Nujol) 1593.1, 1492.8, 1284.5, 1242.1, 1176.5, 1033.8, 825.5, 620.0, 525.0  $\text{cm}^{-1}$ ;  $^1\text{H}$  NMR ( $\text{CDCl}_3$ , 300 MHz):  $\delta$  1.80 (qnt,  $J = 6.9$  Hz, 2H,  $\text{CH}_2$ ), 2.90 (t,  $J = 6.9$  Hz, 4H,  $2\text{CH}_2$ ), 3.78 (s, 6H,  $2\text{OCH}_3$ ), 6.78-6.83 (m, 4H, ArH), 7.25-7.32 (m, 4H, ArH);  $^{13}\text{C}$  NMR ( $\text{CDCl}_3$ , 75 MHz):  $\delta$  28.5, 34.4, 55.2, 114.5, 125.9, 133.4, 158.9; HRMS (ESI) calcd for  $\text{C}_{17}\text{H}_{20}\text{O}_2\text{KS}_2$  359.0542; found 359.0540.

**1-(2-(4-Chlorophenylthio)propylthio)-4-chlorobenzene,**

Entry 7; Obtained as pale yellow liquid (elution with light petroleum).

IR (Nujol) 1176.5, 1095.5, 1010.6, 817.8, 744.5, 550.0, 493.7  $\text{cm}^{-1}$ ;  $^1\text{H}$  NMR ( $\text{CDCl}_3$ , 300 MHz):  $\delta$  1.37 (d,  $J = 6.6$  Hz, 3H,  $\text{CH}_3$ ), 2.71-2.79 (m, 1H, CH), 3.12-3.19 (m, 2H,  $\text{CH}_2$ ), 7.10 (d,  $J = 8.4$  Hz, 2H, ArH), 7.17 (d,  $J = 8.4$  Hz, 2H, ArH), 7.21 (s, 4H, ArH);  $^{13}\text{C}$  NMR ( $\text{CDCl}_3$ , 75 MHz):  $\delta$  19.2, 40.8, 42.7, 128.9, 129.0, 131.0, 132.3, 133.5, 133.8, 134.0; HRMS (ESI) calcd for  $\text{C}_{15}\text{H}_{14}\text{Cl}_2\text{KS}_2$  366.9551; found 366.9557.

**1-(3-(4-Chlorophenylthio)propylthio)-4-chlorobenzene,**

Entry 8; Obtained as colourless liquid (elution with light petroleum).

IR (Nujol) 1249.8, 1095.5, 1010.6, 813.9, 744.5, 540.0, 489.9  $\text{cm}^{-1}$ ;  $^1\text{H}$  NMR ( $\text{CDCl}_3$ , 300 MHz):  $\delta$  1.89 (quintet,  $J = 6.9$  Hz, 2H,  $\text{CH}_2$ ), 2.99 (t,  $J = 6.9$  Hz, 4H,  $2\text{CH}_2$ ), 7.22 (s, 8H, ArH);  $^{13}\text{C}$  NMR ( $\text{CDCl}_3$ , 75 MHz):  $\delta$  28.0, 32.5, 129.0, 130.7, 132.1, 134.3; HRMS (ESI) calcd for  $\text{C}_{15}\text{H}_{14}\text{Cl}_2\text{KS}_2$  366.9551; found 366.9549.

**1-(1-(4-Fluorophenylthio)propan-2-ylthio)-4-fluorobenzene,**

Entry 9; Obtained as pale yellow liquid (elution with light petroleum).

IR (Nujol) 1589.2, 1488.9, 1230.5, 1157.2, 1091.6, 1006.0, 980.0, 825.5, 620.0, 513.0  $\text{cm}^{-1}$ ;  $^1\text{H}$  NMR ( $\text{CDCl}_3$ , 300 MHz):  $\delta$  1.37 (d,  $J = 6.6$  Hz, 3H,  $\text{CH}_3$ ), 2.73-2.78 (m, 1H, CH), 3.06-3.15 (m, 2H,  $\text{CH}_2$ ), 6.90-7.00 (m, 4H, ArH), 7.18-7.29 (m, 4H, ArH),  $^{13}\text{C}$  NMR ( $\text{CDCl}_3$ , 75 MHz):  $\delta$  19.2, 41.7, 41.8, 43.1, 115.8, 115.82, 116.09, 116.1, 128.7, 128.8, 130.5, 130.54, 132.5, 132.6, 135.3, 135.4, 160.2, 160.8, 163.4, 164.1; HRMS (ESI) calcd for  $\text{C}_{15}\text{H}_{14}\text{F}_2\text{KS}_2$  335.0142; found 335.0144.

**1-(3-(4-Fluorophenylthio)propylthio)-4-fluorobenzene,**

Entry 10; Obtained as pale yellow liquid (elution with light petroleum).

IR (Nujol) 1589.2, 1488.9, 1226.6, 1157.2, 1091.6, 1014.5, 825.5, 628.8, 513.0  $\text{cm}^{-1}$ ;  $^1\text{H}$  NMR ( $\text{CDCl}_3$ , 300 MHz):  $\delta$  1.85 (quintet,  $J = 6.9$  Hz, 2H,  $\text{CH}_2$ ), 2.96 (t,  $J = 6.9$  Hz, 4H,  $2\text{CH}_2$ ), 6.94-7.00 (m, 4H, ArH), 7.28-7.33 (m, 4H, ArH);  $^{13}\text{C}$  NMR ( $\text{CDCl}_3$ , 75 MHz):  $\delta$  28.3, 33.7, 115.8, 116.1, 130.6, 130.7, 132.5, 132.6, 160.2, 163.4; HRMS (ESI) calcd for  $\text{C}_{15}\text{H}_{14}\text{F}_2\text{KS}_2$  335.0142; found 335.0143.

**2-(1-(2,6-Ddimethylphenylthio)propan-2-ylthio)-1,3-dimethylbenzene,**

Entry 11; Obtained as colourless liquid (elution with light petroleum).

IR (Nujol) 1600.8, 1558.4, 1485.1, 1176.5, 1064.6, 1041.5, 1006.8, 879.5, 810.0, 690.0, 550.0, 451.3  $\text{cm}^{-1}$ ;  $^1\text{H}$  NMR ( $\text{CDCl}_3$ , 300 MHz):  $\delta$  1.45 (d,  $J = 6.6$  Hz, 3H,  $\text{CH}_3$ ), 2.20 (s, 3H, Ar $\text{CH}_3$ ), 2.23 (s, 3H, Ar $\text{CH}_3$ ), 2.29 (s, 3H, Ar $\text{CH}_3$ ), 2.35 (s, 3H, Ar $\text{CH}_3$ ), 2.71-2.80 (m, 1H, CH), 3.21-3.26 (m, 2H,  $\text{CH}_2$ ), 6.88-7.09 (m, 6H, ArH);  $^{13}\text{C}$  NMR ( $\text{CDCl}_3$ , 75 MHz):  $\delta$  19.4, 19.9, 20.3, 20.77, 20.8, 39.9, 41.6, 126.9, 128.2, 129.5, 130.1, 130.3, 133.1, 133.3, 134.4, 135.0, 135.9, 137.0.

**2-(3-(2,6-Dimethylphenylthio)propylthio)-1,3-dimethylbenzene,**

Entry 12; Obtained as colourless liquid (elution with light petroleum).

IR (Nujol) 1600.8, 1060.8, 806.2  $\text{cm}^{-1}$ ;  $^1\text{H}$  NMR ( $\text{CDCl}_3$ , 300 MHz):  $\delta$  1.99 (quintet,  $J = 6.9$  Hz, 2H,  $\text{CH}_2$ ), 2.28-2.32 (s, 12H, 4 $\text{CH}_3$ ), 3.03 (t,  $J = 6.9$  Hz, 4H, 2 $\text{CH}_2$ ), 6.89 (d,  $J = 6.9$  Hz, 2H, ArH), 7.03-7.07 (m, 4H, ArH).  $^{13}\text{C}$  NMR ( $\text{CDCl}_3$ , 75 MHz):  $\delta$  19.9, 21.0, 28.2, 31.9, 126.6, 128.7, 130.0, 134.5, 135.0, 135.9; HRMS (ESI) calcd for  $\text{C}_{19}\text{H}_{24}\text{K}_2\text{S}_2$  394.0594; found 394.0597.

**1-(2-(Pentylthio)propylthio)pentane,**

Entry 13; Obtained as pale yellow liquid (elution with light petroleum).

IR (Nujol) 1168.8  $\text{cm}^{-1}$ ;  $^1\text{H}$  NMR ( $\text{CDCl}_3$ , 300 MHz):  $\delta$  0.88-0.92 (m, 6H, 2 $\text{CH}_3$ ), 1.29-1.39 (m, 8H, 4 $\text{CH}_2$ ), 1.35 (d,  $J = 6.9$  Hz, 3H,  $\text{CH}_3$ ), 1.54-1.61 (m, 4H, 2 $\text{CH}_2$ ), 2.50-2.58 (m, 5H, CH & 2 S- $\text{CH}_2$ ), 2.82-2.88 (m, 2H, S- $\text{CH}_2$ -CH);  $^{13}\text{C}$  NMR ( $\text{CDCl}_3$ , 75 MHz):  $\delta$  13.9, 20.2, 22.2, 29.3, 29.4, 30.6, 30.9, 31.1, 33.9, 39.6, 39.8; HRMS (ESI) calcd for  $\text{C}_{13}\text{H}_{28}\text{KS}_2$  287.1269; found 287.1271.

**1-(3-(Pentylthio)propylthio)pentane,**

Entry 14; Obtained as colourless liquid (elution with light petroleum).

IR (Nujol) 1253.6  $\text{cm}^{-1}$ ;  $^1\text{H}$  NMR ( $\text{CDCl}_3$ , 300 MHz):  $\delta$  0.90 (t,  $J = 6.9$  Hz, 6H, 2 $\text{CH}_3$ ), 1.29-1.41 (m, 8H, 4 $\text{CH}_2$ ), 1.56-1.61 (m, 4H, 2 $\text{CH}_2$ ), 1.86 (quintet,  $J = 6.9$  Hz, 2H,  $\text{CH}_2$ ), 2.51 (t,  $J = 7.2$  Hz, 4H, 2 $\text{CH}_2$ ), 2.59-2.62 (m, 4H, 2 $\text{CH}_2$ );  $^{13}\text{C}$  NMR ( $\text{CDCl}_3$ , 75 MHz):  $\delta$  14.0, 22.3, 29.3, 29.4, 31.0, 31.1, 32.1; HRMS (ESI) calcd for  $\text{C}_{13}\text{H}_{28}\text{KS}_2$  287.1269; found 287.1270.

**(1-(Cyclohexylthio)propan-2-ylthio)cyclohexane [3],**

Entry 15; Obtained as pale yellow liquid (elution with light petroleum).

IR (Nujol) 1265.2, 995.2, 887.2, 817.8, 721.3  $\text{cm}^{-1}$ ;  $^1\text{H}$  NMR ( $\text{CDCl}_3$ , 300 MHz):  $\delta$  1.29-1.32 (m, 10H, CyH), 1.34 (d,  $J = 6.6$  Hz, 3H,  $\text{CH}_3$ ), 1.62 (s, 2H, CyH), 1.76 (s, 4H, CyH), 1.95 (s, 4H, CyH), 2.49-2.75 (m, 3H, 2CyH, CH), 2.84-2.97 (m, 2H,  $\text{CH}_2$ );  $^{13}\text{C}$  NMR ( $\text{CDCl}_3$ , 75 MHz):  $\delta$  20.7, 25.6, 25.9, 25.94, 33.5, 33.6, 33.7, 33.9, 37.8, 38.2, 42.4, 44.2; HRMS (ESI) calcd for  $\text{C}_{15}\text{H}_{28}\text{KS}_2$  311.1269; found 311.1271.

### **3-(Cyclohexylthio)propylthio)cyclohexane,**

Entry 16; Obtained as colourless liquid (elution with light petroleum).

IR (Nujol) 1203.5, 999.1, 883.3, 817.8, 717.5  $\text{cm}^{-1}$ ;  $^1\text{H}$  NMR ( $\text{CDCl}_3$ , 300 MHz):  $\delta$  1.24-1.41 (m, 11H, Cy-H), 1.60-1.99 (m, 12H, Cy-H &  $\text{CH}_2$ ), 2.63 (t,  $J = 7.2$  Hz, 4H, 2 S- $\text{CH}_2$ ), 2.97-2.99 (m, 2H, 2 S-CH);  $^{13}\text{C}$  NMR ( $\text{CDCl}_3$ , 75 MHz):  $\delta$  25.7, 25.8, 25.9, 26.1, 29.0, 30.1, 33.66, 33.7, 37.8, 33.9, 43.4, 43.5, 44.7, 49.3; HRMS (ESI) calcd for  $\text{C}_{15}\text{H}_{28}\text{KS}_2$  311.1269; found 311.1270.

### **1-(1-(2-Methoxyphenylthio)propan-2-ylthio)-2-methoxybenzene,**

Entry 17; Obtained as pale yellow liquid (elution with 3% ethyl acetate - light petroleum).

IR (Nujol) 1577.7, 1296.1, 1272.9, 1242.1, 1180.4, 1130.2, 1072.3, 1026.1, 833.2, 794.6, 748.3, 721.3, 675.0, 525.0  $\text{cm}^{-1}$ ;  $^1\text{H}$  NMR ( $\text{CDCl}_3$ , 300 MHz):  $\delta$  1.42 (d,  $J = 6.9$  Hz, 3H,  $\text{CH}_3$ ), 2.64-2.72 (m, 1H, CH), 3.24-3.37 (m, 2H,  $\text{CH}_2$ ), 3.70 (s, 3H,  $\text{OCH}_3$ ), 3.71 (s, 3H,  $\text{OCH}_3$ ), 6.74-6.84 (m, 4H, ArH), 7.07-7.23 (m, 4H, ArH);  $^{13}\text{C}$  NMR ( $\text{CDCl}_3$ , 75 MHz):  $\delta$  18.8, 38.7, 39.8, 55.2, 110.2, 110.4, 120.49, 120.5, 121.8, 123.1, 127.3, 128.4, 130.3, 133.2, 157.4, 158.4; HRMS (ESI) calcd for  $\text{C}_{17}\text{H}_{20}\text{O}_2\text{NaS}_2$  343.0802; found 343.0801.

### **2-(1-(Naphthalene-6-ylthio)propan-2-ylthio)naphthalene,**

Entry 18; Obtained as white crystalline solid (elution with 2% ethyl acetate - light petroleum), mp. 91-93  $^\circ\text{C}$ .

IR (KBr) 817.8, 740.6, 478.3  $\text{cm}^{-1}$ ;  $^1\text{H}$  NMR ( $\text{CDCl}_3$ , 300 MHz):  $\delta$  1.47 (d,  $J = 6.9$  Hz, 3H,  $\text{CH}_3$ ), 2.82-2.90 (m, 1H, CH), 3.37-3.44 (m, 2H,  $\text{CH}_2$ ), 7.23 (d,  $J = 8.4$  Hz, 1H, ArH), 7.33-7.44 (m, 6H, ArH), 7.48-7.55 (m, 3H, ArH), 7.61 (d,  $J = 8.4$  Hz, 1H, ArH), 7.67-7.74 (m, 3H, ArH);  $^{13}\text{C}$  NMR ( $\text{CDCl}_3$ , 75 MHz):  $\delta$  19.2, 40.5, 42.4, 125.7, 126.1, 126.4, 126.43, 127.0, 127.3, 127.5, 127.57, 127.6, 128.38, 128.4, 129.7, 130.9, 131.5, 131.7, 132.2, 132.9, 133.5, 133.55, HRMS (ESI) calcd for  $\text{C}_{23}\text{H}_{20}\text{KS}_2$  399.0643; found 399.0645.

### **1-(3-(Phenylthio)propylthio)benzene and its 2-Deuterated product,**

Entry 19; Obtained as colourless liquid mixture (elution with light petroleum).

$^1\text{H}$  NMR ( $\text{CDCl}_3$ , 300 MHz):  $\delta$  1.90-1.99 (m,  $\text{CHD}$  &  $\text{CH}_2$ ), 3.03-3.07 (m, 2 $\text{CH}_2$ , each from the mixture), 7.14-7.33 (m, 10 ArH, each from the mixture),  $^{13}\text{C}$  NMR ( $\text{CDCl}_3$ , 75 MHz):  $\delta$  27.9 (t,  $J = 20$  Hz,  $\text{CHD}$ ), 28.3, 32.3, 32.4, 126.1, 128.9, 129.4, 136.0.

#### References:

1. Nagai, T.; Kumadaki, I.; Miki, T.; Kobayashi, Y.; Tomizawa, G. *Chem. Pharm. Bull.* **1986**, *34*, 1546–1552. <http://dx.doi.org/10.1248/cpb.34.1546>.
2. Abou, A.; Foubelo, F.; Miguel, Y. *Arkivoc*, **2007**, (iv), 196–205. <http://www.arkat-usa.org/arkivoc-journal/browse-arkivoc/2007/4/>
3. Anklam, E.; *Synthesis*, **1987**, 841. doi: 10.1055/2-1987-28097.
